# Supplementary material for: A Pyroptosis-Related LncRNA signature in Prognosis and Immune Microenvironment infiltration Prediction of Ovarian Cancer
Source: Preprints.org preprint supplement (doi:10.20944/preprints202201.0346.v1), 2022-01-24
Supplement: Supplementary file 1 [file supplementary]

## Sheet: net
Supplement Table 2. A list of all the PRLs screened by Pearson correlation analysis
PRGs	lncRNA	correation	p value
PLCG1	RP11-34P13.13	0.445906	6.48075e-20
PLCG1	AP006222.2	0.496086	6.13709e-25
PLCG1	RP4-669L17.10	0.436141	4.97018e-19
CASP9	RP11-206L10.3	0.52167	7.74694e-28
NOD1	RP11-206L10.3	0.489121	3.4335e-24
PLCG1	RP11-206L10.3	0.569955	4.98142e-34
SCAF11	RP11-206L10.3	0.483669	1.28602e-23
TIRAP	RP11-206L10.3	0.48977	2.9294e-24
NOD1	RP11-206L10.5	0.464075	1.22362e-21
PLCG1	RP11-206L10.5	0.46352	1.38631e-21
CASP8	RP11-206L10.2	0.425785	4.01786e-18
CASP9	RP11-206L10.2	0.540079	4.42465e-30
GSDMB	RP11-206L10.2	0.419692	1.32924e-17
NOD1	RP11-206L10.2	0.539302	5.5391e-30
PLCG1	RP11-206L10.2	0.640487	3.80153e-45
SCAF11	RP11-206L10.2	0.445353	7.28582e-20
TIRAP	RP11-206L10.2	0.505068	6.28037e-26
CASP9	RP11-206L10.9	0.574815	1.03841e-34
GSDMB	RP11-206L10.9	0.513383	7.16253e-27
PLCG1	RP11-206L10.9	0.504065	8.12928e-26
SCAF11	RP11-206L10.9	0.44327	1.13063e-19
CASP9	FAM87B	0.560991	8.39969e-33
NOD1	FAM87B	0.50211	1.34065e-25
PLCG1	FAM87B	0.46911	3.9022e-22
SCAF11	FAM87B	0.44172	1.56474e-19
CASP3	LINC01128	0.520779	9.86775e-28
CASP8	LINC01128	0.435972	5.14562e-19
CASP9	LINC01128	0.695104	5.4494e-56
NLRC4	LINC01128	0.49142	1.9535e-24
NOD1	LINC01128	0.595924	8.36132e-38
PLCG1	LINC01128	0.5963	7.32914e-38
PRKACA	LINC01128	0.468215	4.78804e-22
SCAF11	LINC01128	0.539772	4.83656e-30
TIRAP	LINC01128	0.479357	3.59391e-23
CASP9	LINC00115	0.461281	2.28792e-21
GSDMB	LINC00115	0.499182	2.81842e-25
SCAF11	LINC00115	0.402535	3.39658e-16
NLRP1	RP11-54O7.1	0.446192	6.09866e-20
PLCG1	RP11-54O7.1	0.514188	5.78626e-27
NLRP1	RP11-54O7.3	0.415622	2.9164e-17
PLCG1	RP11-54O7.3	0.431561	1.26379e-18
CASP9	RP11-54O7.11	0.401404	4.17863e-16
PLCG1	LINC01342	0.449937	2.74119e-20
GSDMB	RP11-465B22.8	0.425601	4.16747e-18
CASP9	TTLL10-AS1	0.405046	2.13856e-16
GSDMB	TTLL10-AS1	0.445845	6.56457e-20
NLRP6	TTLL10-AS1	0.420491	1.13775e-17
CASP9	RP5-902P8.12	0.422357	7.9004e-18
GSDMB	RP5-902P8.12	0.539484	5.25475e-30
CASP9	RP5-902P8.10	0.51995	1.23537e-27
GSDMB	RP5-902P8.10	0.417652	1.97325e-17
PLCG1	RP5-902P8.10	0.400444	4.97906e-16
CASP8	RP5-890O3.9	0.434313	7.22569e-19
CASP9	RP5-890O3.9	0.618114	2.59027e-41
GSDMB	RP5-890O3.9	0.54096	3.4287e-30
NLRP6	RP5-890O3.9	0.403646	2.76934e-16
NOD1	RP5-890O3.9	0.521865	7.34688e-28
PLCG1	RP5-890O3.9	0.567845	9.76172e-34
SCAF11	RP5-890O3.9	0.526119	2.28829e-28
TIRAP	RP5-890O3.9	0.420924	1.04555e-17
CASP3	RP4-758J18.2	0.468464	4.52324e-22
CASP8	RP4-758J18.2	0.460861	2.51286e-21
CASP9	RP4-758J18.2	0.715044	1.39499e-60
NOD1	RP4-758J18.2	0.473303	1.48497e-22
PLCG1	RP4-758J18.2	0.508221	2.77618e-26
PRKACA	RP4-758J18.2	0.438751	2.90193e-19
SCAF11	RP4-758J18.2	0.533128	3.22978e-29
TIRAP	RP4-758J18.2	0.463021	1.55045e-21
CASP9	RP4-758J18.13	0.53181	4.68318e-29
GSDMB	RP4-758J18.13	0.432849	9.7345e-19
SCAF11	RP4-758J18.13	0.459384	3.48869e-21
GSDMC	RP4-758J18.10	0.406854	1.52884e-16
GSDMD	RP4-758J18.10	0.426213	3.69099e-18
CASP3	RP5-832C2.5	0.460332	2.82649e-21
CASP8	RP5-832C2.5	0.425048	4.6495e-18
CASP9	RP5-832C2.5	0.517733	2.24547e-27
PRKACA	RP5-832C2.5	0.406889	1.5189e-16
SCAF11	RP5-832C2.5	0.476367	7.26831e-23
CASP9	RP11-345P4.9	0.605121	3.17265e-39
PLCG1	RP11-345P4.9	0.448805	3.49485e-20
PRKACA	RP11-345P4.9	0.442012	1.47183e-19
SCAF11	RP11-345P4.9	0.432106	1.13163e-18
CASP9	RP11-345P4.7	0.605065	3.23677e-39
GSDMB	RP11-345P4.7	0.449781	2.83498e-20
NLRP6	RP11-345P4.7	0.40408	2.5566e-16
NOD1	RP11-345P4.7	0.561192	7.89291e-33
PLCG1	RP11-345P4.7	0.604222	4.38872e-39
SCAF11	RP11-345P4.7	0.475011	9.98076e-23
TIRAP	RP11-345P4.7	0.501701	1.48796e-25
CASP9	RP1-283E3.8	0.527922	1.3887e-28
NLRP1	RP1-283E3.8	0.400974	4.52058e-16
NOD1	RP1-283E3.8	0.499881	2.36208e-25
PLCG1	RP1-283E3.8	0.529406	9.18783e-29
SCAF11	RP1-283E3.8	0.468435	4.55371e-22
TIRAP	RP1-283E3.8	0.457759	4.99655e-21
CASP9	RP5-892K4.1	0.486371	6.70311e-24
GSDMB	RP5-892K4.1	0.453798	1.18973e-20
NOD1	RP5-892K4.1	0.46166	2.10273e-21
PLCG1	RP5-892K4.1	0.51975	1.30419e-27
CASP9	RP11-181G12.2	0.641248	2.77905e-45
GSDMB	RP11-181G12.2	0.457523	5.26339e-21
NLRP1	RP11-181G12.2	0.413559	4.32529e-17
NLRP6	RP11-181G12.2	0.400939	4.54953e-16
NOD1	RP11-181G12.2	0.514724	5.01753e-27
PLCG1	RP11-181G12.2	0.618333	2.38363e-41
PRKACA	RP11-181G12.2	0.470995	2.53184e-22
SCAF11	RP11-181G12.2	0.474819	1.04364e-22
GSDMB	RP4-713A8.1	0.403389	2.90355e-16
GSDMD	RP3-395M20.12	0.400072	5.32789e-16
CASP8	RP3-395M20.8	0.404586	2.3283e-16
GSDMB	RP3-395M20.8	0.502277	1.28462e-25
GSDMC	RP3-395M20.8	0.428395	2.38865e-18
GSDMD	RP3-395M20.8	0.438886	2.82188e-19
IL1B	RP3-395M20.8	0.412728	5.06538e-17
NLRC4	RP3-395M20.8	0.478756	4.14326e-23
NLRP3	RP3-395M20.8	0.538353	7.27921e-30
NOD1	RP3-395M20.8	0.561407	7.38295e-33
NOD2	RP3-395M20.8	0.597503	4.80444e-38
SCAF11	RP3-395M20.8	0.423511	6.29692e-18
TIRAP	RP3-395M20.8	0.453497	1.27019e-20
CASP9	RP11-168F9.2	0.401484	4.11834e-16
GSDMB	RP11-168F9.2	0.408868	1.04944e-16
CASP9	RP11-46F15.2	0.503203	1.01396e-25
GSDMB	RP11-46F15.2	0.50305	1.05436e-25
PLCG1	RP11-46F15.2	0.448618	3.63735e-20
CASP3	TP73-AS1	0.477284	5.86132e-23
CASP8	TP73-AS1	0.466697	6.76429e-22
CASP9	TP73-AS1	0.745907	1.59261e-68
GSDMB	TP73-AS1	0.411847	5.98728e-17
NLRC4	TP73-AS1	0.483216	1.43371e-23
NLRP1	TP73-AS1	0.476539	6.98197e-23
NOD1	TP73-AS1	0.637333	1.37879e-44
PLCG1	TP73-AS1	0.735669	9.12763e-66
PRKACA	TP73-AS1	0.478664	4.23457e-23
SCAF11	TP73-AS1	0.603219	6.29612e-39
TIRAP	TP73-AS1	0.572767	2.01728e-34
CASP8	RP1-286D6.5	0.423336	6.51748e-18
CASP9	RP1-286D6.5	0.657961	2.27417e-48
GSDMB	RP1-286D6.5	0.481729	2.04594e-23
NLRP1	RP1-286D6.5	0.416857	2.30034e-17
NLRP6	RP1-286D6.5	0.449676	2.89949e-20
NOD1	RP1-286D6.5	0.513808	6.39977e-27
PLCG1	RP1-286D6.5	0.589322	8.21354e-37
PRKACA	RP1-286D6.5	0.411475	6.42332e-17
SCAF11	RP1-286D6.5	0.503674	8.98667e-26
TIRAP	RP1-286D6.5	0.430844	1.46042e-18
CASP9	LINC01134	0.420579	1.1184e-17
CASP3	LINC00337	0.445652	6.83958e-20
GSDMB	RP1-202O8.2	0.433986	7.72354e-19
NLRP6	RP1-202O8.2	0.428955	2.1355e-18
CASP9	RP11-312B8.1	0.478479	4.42312e-23
CASP9	RP11-338N10.1	0.401795	3.88989e-16
CASP9	RP11-338N10.2	0.453326	1.31815e-20
CASP9	RP11-338N10.3	0.4641	1.21661e-21
CASP3	RP3-467L1.6	0.429821	1.79472e-18
CASP8	RP3-467L1.6	0.491122	2.10216e-24
CASP9	RP3-467L1.6	0.550034	2.36658e-31
GSDMB	RP3-467L1.6	0.414582	3.55876e-17
NOD1	RP3-467L1.6	0.43646	4.65491e-19
PLCG1	RP3-467L1.6	0.538144	7.73129e-30
SCAF11	RP3-467L1.6	0.642665	1.54756e-45
CASP9	RP3-467L1.4	0.456849	6.10459e-21
CASP9	RP5-1115A15.1	0.436054	5.06051e-19
GSDMB	RP5-1115A15.1	0.501549	1.54651e-25
NLRP6	RP5-1115A15.1	0.400962	4.52995e-16
NOD1	RP5-1115A15.1	0.406543	1.61996e-16
GSDMB	RP4-633I8.4	0.402713	3.28766e-16
CASP9	ENO1-IT1	0.526069	2.32038e-28
NLRC4	ENO1-IT1	0.414956	3.31269e-17
NOD1	ENO1-IT1	0.506693	4.1283e-26
SCAF11	ENO1-IT1	0.455704	7.84821e-21
TIRAP	ENO1-IT1	0.426895	3.22289e-18
AIM2	PIK3CD-AS1	0.594705	1.27993e-37
CASP5	PIK3CD-AS1	0.533269	3.10309e-29
IL1B	PIK3CD-AS1	0.561804	6.52416e-33
NLRC4	PIK3CD-AS1	0.631039	1.7261e-43
NLRP3	PIK3CD-AS1	0.678507	1.90711e-52
NOD1	PIK3CD-AS1	0.413691	4.21764e-17
NOD2	PIK3CD-AS1	0.589452	7.8561e-37
CASP3	RP11-84A14.4	0.449023	3.33562e-20
CASP6	RP11-84A14.4	0.448838	3.47036e-20
CASP9	RP11-84A14.4	0.547266	5.39553e-31
SCAF11	RP11-84A14.4	0.455703	7.84985e-21
CASP9	RP4-734G22.3	0.621267	7.79379e-42
GSDMB	RP4-734G22.3	0.491355	1.98522e-24
NLRP6	RP4-734G22.3	0.45316	1.3666e-20
NOD1	RP4-734G22.3	0.550983	1.78111e-31
PLCG1	RP4-734G22.3	0.591293	4.17459e-37
SCAF11	RP4-734G22.3	0.476391	7.22732e-23
TIRAP	RP4-734G22.3	0.425744	4.05088e-18
CASP9	RP4-635E18.8	0.653309	1.72076e-47
GSDMB	RP4-635E18.8	0.546817	6.16405e-31
NOD1	RP4-635E18.8	0.400426	4.99549e-16
PLCG1	RP4-635E18.8	0.527905	1.39533e-28
SCAF11	RP4-635E18.8	0.448181	3.99331e-20
CASP9	RP4-635E18.7	0.555391	4.69845e-32
GSDMB	RP4-635E18.7	0.516208	3.37905e-27
NOD1	RP4-635E18.7	0.486752	6.11232e-24
PLCG1	RP4-635E18.7	0.575565	8.13375e-35
SCAF11	RP4-635E18.7	0.446536	5.66965e-20
CASP9	NPPA-AS1	0.467031	6.26959e-22
GSDMB	NPPA-AS1	0.459776	3.19798e-21
CASP8	TMEM51-AS1	0.448268	3.92018e-20
CASP9	TMEM51-AS1	0.517243	2.56113e-27
GSDMB	TMEM51-AS1	0.471596	2.20415e-22
NLRC4	TMEM51-AS1	0.421307	9.70295e-18
NLRP6	TMEM51-AS1	0.429495	1.9163e-18
NOD1	TMEM51-AS1	0.580977	1.36889e-35
PLCG1	TMEM51-AS1	0.422763	7.29536e-18
SCAF11	TMEM51-AS1	0.464524	1.10571e-21
TIRAP	TMEM51-AS1	0.448587	3.66176e-20
CASP9	RP3-467K16.4	0.526828	1.88126e-28
CASP9	RP4-680D5.8	0.504071	8.11604e-26
GSDMB	RP4-680D5.8	0.487454	5.15457e-24
PLCG1	RP4-680D5.8	0.405253	2.05827e-16
CASP9	RP4-680D5.2	0.661907	3.97184e-49
GSDMB	RP4-680D5.2	0.46637	7.28426e-22
NLRP6	RP4-680D5.2	0.402048	3.71428e-16
NOD1	RP4-680D5.2	0.408718	1.07924e-16
PLCG1	RP4-680D5.2	0.489709	2.97392e-24
SCAF11	RP4-680D5.2	0.473988	1.26668e-22
CASP8	RP11-288I21.1	0.406517	1.62773e-16
CASP9	RP11-288I21.1	0.635873	2.49102e-44
GSDMB	RP11-288I21.1	0.557896	2.18417e-32
NLRC4	RP11-288I21.1	0.494014	1.02843e-24
NLRP1	RP11-288I21.1	0.437118	4.06608e-19
NLRP3	RP11-288I21.1	0.445539	7.00465e-20
NLRP6	RP11-288I21.1	0.45858	4.16824e-21
NOD1	RP11-288I21.1	0.583625	5.65636e-36
PLCG1	RP11-288I21.1	0.608058	1.09087e-39
PRKACA	RP11-288I21.1	0.425442	4.30097e-18
SCAF11	RP11-288I21.1	0.504695	6.9129e-26
TIRAP	RP11-288I21.1	0.479895	3.16423e-23
CASP9	FLJ37453	0.714975	1.44887e-60
PLCG1	FLJ37453	0.436926	4.22996e-19
SCAF11	FLJ37453	0.422268	8.0383e-18
CASP9	RP11-276H7.2	0.460296	2.84921e-21
GSDMD	RP11-276H7.2	0.407513	1.3521e-16
IL1B	RP11-276H7.2	0.436913	4.24109e-19
NLRP3	RP11-276H7.2	0.447651	4.47195e-20
NOD1	RP11-276H7.2	0.435313	5.89025e-19
TIRAP	RP11-276H7.2	0.423626	6.15626e-18
CASP8	RP11-276H7.3	0.413658	4.24489e-17
CASP9	RP11-276H7.3	0.433997	7.70695e-19
GSDMB	RP11-276H7.3	0.403179	3.01765e-16
IL1B	RP11-276H7.3	0.409255	9.75854e-17
NLRC4	RP11-276H7.3	0.411942	5.88012e-17
NLRP3	RP11-276H7.3	0.466506	7.06341e-22
NLRP6	RP11-276H7.3	0.415625	2.91466e-17
NOD1	RP11-276H7.3	0.495862	6.49133e-25
SCAF11	RP11-276H7.3	0.437032	4.13868e-19
TIRAP	RP11-276H7.3	0.444308	9.08522e-20
CASP9	RP4-798A10.2	0.633787	5.76843e-44
GSDMB	RP4-798A10.2	0.608812	8.27915e-40
NLRP1	RP4-798A10.2	0.461766	2.05322e-21
NOD1	RP4-798A10.2	0.503741	8.8327e-26
PLCG1	RP4-798A10.2	0.611278	3.34152e-40
SCAF11	RP4-798A10.2	0.481874	1.97616e-23
TIRAP	RP4-798A10.2	0.461383	2.23662e-21
CASP9	RP4-798A10.7	0.466995	6.32148e-22
CASP9	CROCCP2	0.709491	2.89958e-59
GSDMB	CROCCP2	0.514096	5.92836e-27
NLRP1	CROCCP2	0.427964	2.60365e-18
NLRP6	CROCCP2	0.410648	7.50916e-17
NOD1	CROCCP2	0.461289	2.28418e-21
PLCG1	CROCCP2	0.598503	3.3769e-38
PRKACA	CROCCP2	0.460823	2.53374e-21
SCAF11	CROCCP2	0.476913	6.39489e-23
PLCG1	RP11-108M9.3	0.400111	5.29064e-16
CASP9	RP1-37C10.3	0.483379	1.37885e-23
NLRP1	RP1-37C10.3	0.482181	1.83672e-23
NOD1	RP1-37C10.3	0.459668	3.2755e-21
PLCG1	RP1-37C10.3	0.63143	1.47792e-43
CASP9	RP1-43E13.2	0.581664	1.08934e-35
CASP8	PINK1-AS	0.433043	9.35877e-19
CASP9	PINK1-AS	0.701948	1.59737e-57
GSDMB	PINK1-AS	0.437162	4.02929e-19
NOD1	PINK1-AS	0.499762	2.4343e-25
PLCG1	PINK1-AS	0.612623	2.03044e-40
PRKACA	PINK1-AS	0.473344	1.47104e-22
SCAF11	PINK1-AS	0.504649	6.99551e-26
TIRAP	PINK1-AS	0.430194	1.66495e-18
CASP9	RP5-1071N3.1	0.512175	9.85448e-27
GSDMB	RP5-1071N3.1	0.486663	6.2462e-24
NLRP1	RP5-1071N3.1	0.431966	1.1642e-18
NOD1	RP5-1071N3.1	0.431575	1.26007e-18
PLCG1	RP5-1071N3.1	0.464431	1.12912e-21
CASP3	LINC00339	0.41178	6.06345e-17
CASP6	LINC00339	0.412024	5.78916e-17
CASP8	LINC00339	0.426551	3.45116e-18
CASP9	LINC00339	0.608821	8.25306e-40
GPX4	LINC00339	0.409473	9.36715e-17
CASP9	CDC42-IT1	0.431414	1.30186e-18
GSDMB	CDC42-IT1	0.48799	4.52484e-24
NOD1	CDC42-IT1	0.439116	2.69093e-19
PLCG1	CDC42-IT1	0.457215	5.63178e-21
CASP9	RP1-224A6.9	0.403247	2.9801e-16
CASP9	ZBTB40-IT1	0.452293	1.6491e-20
GSDMB	ZBTB40-IT1	0.425078	4.62177e-18
NOD1	ZBTB40-IT1	0.55367	7.92554e-32
PLCG1	ZBTB40-IT1	0.575949	7.17457e-35
SCAF11	ZBTB40-IT1	0.460216	2.90051e-21
TIRAP	ZBTB40-IT1	0.433735	8.1286e-19
PLCG1	RP11-69E9.1	0.450713	2.31991e-20
CASP9	LINC01355	0.521558	7.986e-28
GSDMB	LINC01355	0.629338	3.38285e-43
PLCG1	LINC01355	0.500357	2.09386e-25
SCAF11	LINC01355	0.450308	2.53155e-20
CASP9	ZNF436-AS1	0.646686	2.88875e-46
GSDMB	ZNF436-AS1	0.464917	1.01201e-21
NOD1	ZNF436-AS1	0.41146	6.44214e-17
PLCG1	ZNF436-AS1	0.498963	2.97916e-25
PRKACA	ZNF436-AS1	0.42903	2.10371e-18
SCAF11	ZNF436-AS1	0.436686	4.44431e-19
GSDMB	RP5-1057J7.7	0.453166	1.36496e-20
CASP9	TCEB3-AS1	0.610865	3.8921e-40
CASP9	RP11-293P20.2	0.406794	1.54588e-16
GSDMB	RP11-10N16.3	0.459052	3.75506e-21
NOD1	RP11-10N16.3	0.454634	9.91429e-21
NOD2	RP11-10N16.3	0.445483	7.08872e-20
TIRAP	RP11-10N16.3	0.400137	5.2651e-16
CASP9	RP3-465N24.6	0.426808	3.2788e-18
CASP8	RP1-317E23.3	0.482866	1.55921e-23
CASP9	RP1-317E23.3	0.628904	4.01454e-43
GSDMB	RP1-317E23.3	0.410427	7.82886e-17
NLRP6	RP1-317E23.3	0.4171	2.1949e-17
NOD1	RP1-317E23.3	0.497716	4.07796e-25
PRKACA	RP1-317E23.3	0.431627	1.24699e-18
SCAF11	RP1-317E23.3	0.504423	7.4145e-26
TIRAP	RP1-317E23.3	0.493154	1.27294e-24
CASP9	RP1-125I3.2	0.431308	1.3299e-18
CASP9	RP11-96L14.7	0.483104	1.47271e-23
GPX4	RP11-96L14.7	0.400722	4.73275e-16
CASP9	RP3-476K8.3	0.532244	4.14456e-29
GSDMB	RP3-476K8.3	0.470925	2.57304e-22
NLRP6	RP3-476K8.3	0.421649	9.07467e-18
NOD1	RP3-476K8.3	0.437164	4.02752e-19
PLCG1	RP3-476K8.3	0.467286	5.91713e-22
SCAF11	RP3-476K8.3	0.471208	2.41053e-22
CASP8	RP5-968P14.2	0.499644	2.50802e-25
CASP9	RP5-968P14.2	0.530089	7.59028e-29
SCAF11	RP5-968P14.2	0.446443	5.78321e-20
GSDMB	RP4-752I6.1	0.48705	5.68631e-24
CASP8	RP11-288L9.4	0.453945	1.15222e-20
CASP9	RP11-288L9.4	0.415666	2.89151e-17
GSDMB	RP11-288L9.4	0.45789	4.85402e-21
NLRC4	RP11-288L9.4	0.416321	2.55014e-17
NOD1	RP11-288L9.4	0.434012	7.68309e-19
NOD2	RP11-288L9.4	0.4663	7.40127e-22
SCAF11	RP11-288L9.4	0.438587	3.00232e-19
GSDMB	RP3-426I6.6	0.458041	4.69529e-21
CASP9	RP11-460I13.2	0.42916	2.04955e-18
CASP8	RP5-1092A3.4	0.427514	2.84831e-18
CASP9	RP5-1092A3.4	0.457802	4.94855e-21
GSDMB	RP5-1092A3.4	0.550942	1.80313e-31
CASP9	RP5-1092A3.5	0.42783	2.67461e-18
GSDMB	RP5-1092A3.5	0.433273	8.931e-19
CASP8	SNHG3	0.422657	7.44789e-18
CASP9	SNHG3	0.512017	1.02734e-26
GSDMB	SNHG3	0.415557	2.95292e-17
SCAF11	SNHG3	0.423806	5.94151e-18
CASP9	SNHG12	0.492376	1.54322e-24
GSDMB	SNHG12	0.506109	4.80111e-26
SCAF11	SNHG12	0.410881	7.18601e-17
CASP9	RP11-467D18.2	0.538002	8.0524e-30
GSDMB	RP11-467D18.2	0.451268	2.05837e-20
NOD1	RP11-467D18.2	0.489304	3.28341e-24
PLCG1	RP11-467D18.2	0.581807	1.03856e-35
SCAF11	RP11-467D18.2	0.452043	1.74087e-20
TIRAP	RP11-467D18.2	0.420337	1.1724e-17
CASP8	MATN1-AS1	0.492914	1.35114e-24
CASP9	MATN1-AS1	0.48753	5.06079e-24
GSDMB	MATN1-AS1	0.453921	1.15825e-20
NLRP6	MATN1-AS1	0.441013	1.8135e-19
NOD1	MATN1-AS1	0.451608	1.9125e-20
NOD2	MATN1-AS1	0.421749	8.89878e-18
SCAF11	MATN1-AS1	0.470765	2.66961e-22
NLRP1	RP11-73M7.6	0.496705	5.25601e-25
NOD1	RP11-73M7.6	0.401948	3.78306e-16
PLCG1	RP11-73M7.6	0.456596	6.45261e-21
NLRP3	RP11-84A19.3	0.405805	1.85776e-16
GSDMB	RP11-84A19.4	0.506594	4.23524e-26
SCAF11	RP11-84A19.4	0.432699	1.00357e-18
GSDMB	RP4-534N18.2	0.500248	2.15249e-25
NLRC4	RP4-534N18.2	0.404598	2.32333e-16
NOD1	RP4-534N18.2	0.484781	9.84263e-24
PLCG1	RP4-534N18.2	0.423444	6.38085e-18
SCAF11	RP4-534N18.2	0.464687	1.06585e-21
GSDMB	RP11-277A4.4	0.492617	1.45381e-24
SCAF11	RP11-277A4.4	0.417459	2.0484e-17
CASP8	RP4-622L5.7	0.434972	6.31524e-19
CASP9	RP4-622L5.7	0.594658	1.30101e-37
GSDMB	RP4-622L5.7	0.57546	8.41623e-35
NLRP1	RP4-622L5.7	0.448603	3.64911e-20
NLRP6	RP4-622L5.7	0.414053	3.93689e-17
NOD1	RP4-622L5.7	0.441601	1.60393e-19
PLCG1	RP4-622L5.7	0.575059	9.59286e-35
SCAF11	RP4-622L5.7	0.480646	2.6475e-23
TIRAP	RP4-622L5.7	0.416395	2.51395e-17
PLCG1	RP4-811H24.9	0.443956	9.78514e-20
GSDMB	RP1-117O3.2	0.490048	2.73678e-24
NOD1	RP1-117O3.2	0.446378	5.86358e-20
PLCG1	RP1-117O3.2	0.416318	2.55129e-17
SCAF11	RP1-117O3.2	0.445407	7.20291e-20
PLCG1	RP11-415J8.7	0.460672	2.62044e-21
CASP3	RP11-415J8.3	0.417893	1.88375e-17
CASP9	RP11-415J8.3	0.606377	2.0125e-39
GSDMB	RP11-415J8.3	0.50937	2.05787e-26
NLRC4	RP11-415J8.3	0.479517	3.46055e-23
NLRP1	RP11-415J8.3	0.46492	1.01129e-21
NLRP3	RP11-415J8.3	0.43879	2.87876e-19
NLRP6	RP11-415J8.3	0.416506	2.46092e-17
NOD1	RP11-415J8.3	0.558774	1.66747e-32
PLCG1	RP11-415J8.3	0.620454	1.06371e-41
PRKACA	RP11-415J8.3	0.423621	6.1628e-18
SCAF11	RP11-415J8.3	0.517393	2.46023e-27
TIRAP	RP11-415J8.3	0.460723	2.59099e-21
CASP8	RP5-997D16.2	0.508338	2.69296e-26
CASP9	RP5-997D16.2	0.494959	8.13085e-25
NLRP6	RP5-997D16.2	0.407694	1.30725e-16
NOD1	RP5-997D16.2	0.504385	7.48777e-26
PLCG1	RP5-997D16.2	0.559523	1.32352e-32
PRKACA	RP5-997D16.2	0.51607	3.50514e-27
SCAF11	RP5-997D16.2	0.503593	9.17502e-26
TIRAP	RP5-997D16.2	0.412274	5.52194e-17
CASP8	RP11-244H3.1	0.471019	2.51796e-22
CASP9	RP11-244H3.1	0.452598	1.54377e-20
GSDMB	RP11-244H3.1	0.517698	2.26661e-27
NLRP6	RP11-244H3.1	0.522048	6.98858e-28
NOD1	RP11-244H3.1	0.523102	5.24203e-28
PLCG1	RP11-244H3.1	0.458409	4.32871e-21
SCAF11	RP11-244H3.1	0.461921	1.98363e-21
GSDMB	RP4-728D4.2	0.445614	6.89417e-20
GSDMD	RP4-728D4.2	0.428758	2.22135e-18
NLRC4	RP4-728D4.2	0.471791	2.10713e-22
NLRP3	RP4-728D4.2	0.474948	1.01285e-22
NOD1	RP4-728D4.2	0.473213	1.51629e-22
NOD2	RP4-728D4.2	0.510463	1.54569e-26
GSDMB	RP4-789D17.5	0.42826	2.45399e-18
GSDMB	RP4-665N4.8	0.482581	1.66925e-23
CASP9	RP11-268J15.5	0.565383	2.12729e-33
GSDMB	RP11-268J15.5	0.526495	2.0625e-28
NOD1	RP11-268J15.5	0.405239	2.06362e-16
PLCG1	RP11-268J15.5	0.534902	1.95315e-29
PRKACA	RP11-268J15.5	0.502039	1.36507e-25
SCAF11	RP11-268J15.5	0.450826	2.26429e-20
GPX4	LINC01137	0.485002	9.33223e-24
GSDMD	LINC01137	0.473879	1.29896e-22
IL1B	LINC01137	0.428054	2.55757e-18
NLRC4	LINC01137	0.409419	9.46342e-17
NLRP3	LINC01137	0.410298	8.02188e-17
NOD2	LINC01137	0.481711	2.05463e-23
PYCARD	LINC01137	0.503553	9.26939e-26
CASP9	RP5-864K19.4	0.430552	1.54925e-18
CASP9	RP11-69E11.4	0.437386	3.84725e-19
GSDMB	RP11-69E11.4	0.500238	2.15763e-25
NLRP6	RP11-69E11.4	0.414448	3.65106e-17
NOD1	RP11-69E11.4	0.42732	2.96117e-18
PLCG1	RP11-69E11.4	0.413595	4.29597e-17
SCAF11	RP11-69E11.4	0.413917	4.04023e-17
CASP8	RP11-69E11.8	0.410915	7.14041e-17
CASP9	RP11-69E11.8	0.476072	7.78844e-23
NLRP6	RP11-69E11.8	0.45926	3.58594e-21
NOD1	RP11-69E11.8	0.579443	2.27589e-35
PLCG1	RP11-69E11.8	0.514764	4.96557e-27
SCAF11	RP11-69E11.8	0.489913	2.82894e-24
TIRAP	RP11-69E11.8	0.508996	2.2688e-26
CASP8	RP1-39G22.7	0.400879	4.599e-16
CASP9	RP1-39G22.7	0.42523	4.48512e-18
SCAF11	RP1-39G22.7	0.453797	1.19003e-20
CASP9	RP1-228H13.5	0.439367	2.55433e-19
NOD1	RP1-228H13.5	0.408631	1.09697e-16
PLCG1	RP1-228H13.5	0.612085	2.47916e-40
SCAF11	RP1-228H13.5	0.459805	3.1774e-21
CASP3	RP11-656D10.6	0.431454	1.29143e-18
CASP9	RP11-656D10.6	0.441592	1.60687e-19
NOD1	RP11-656D10.6	0.447757	4.37171e-20
PLCG1	RP11-656D10.6	0.480393	2.8115e-23
PRKACA	RP11-656D10.6	0.463593	1.3637e-21
SCAF11	RP11-656D10.6	0.492353	1.55217e-24
CASP8	NFYC-AS1	0.464874	1.02185e-21
CASP9	NFYC-AS1	0.490074	2.7195e-24
GSDMB	NFYC-AS1	0.472069	1.97602e-22
NLRP6	NFYC-AS1	0.416531	2.44922e-17
NOD1	NFYC-AS1	0.479853	3.19558e-23
PLCG1	NFYC-AS1	0.531681	4.85654e-29
SCAF11	NFYC-AS1	0.545792	8.34253e-31
TIRAP	NFYC-AS1	0.502975	1.07471e-25
CASP8	SLFNL1-AS1	0.442391	1.35942e-19
CASP9	SLFNL1-AS1	0.508391	2.65597e-26
GSDMB	SLFNL1-AS1	0.553967	7.24359e-32
NLRP6	SLFNL1-AS1	0.494782	8.49834e-25
NOD1	SLFNL1-AS1	0.585907	2.62325e-36
PLCG1	SLFNL1-AS1	0.575728	7.71145e-35
PRKACA	SLFNL1-AS1	0.457091	5.78821e-21
SCAF11	SLFNL1-AS1	0.491949	1.71487e-24
TIRAP	SLFNL1-AS1	0.435444	5.73375e-19
CASP9	RP11-399E6.4	0.400505	4.92395e-16
GSDMB	RP11-399E6.4	0.420355	1.16828e-17
CASP9	RP11-223A3.1	0.420728	1.08645e-17
CASP9	RP5-994D16.3	0.474701	1.07289e-22
SCAF11	RP5-994D16.3	0.403354	2.9222e-16
CASP3	RP5-994D16.9	0.507802	3.09625e-26
CASP8	RP5-994D16.9	0.447792	4.3391e-20
CASP9	RP5-994D16.9	0.551896	1.35398e-31
NLRC4	RP5-994D16.9	0.484238	1.12175e-23
NOD1	RP5-994D16.9	0.544827	1.10817e-30
PLCG1	RP5-994D16.9	0.490692	2.33678e-24
PRKACA	RP5-994D16.9	0.43653	4.5887e-19
SCAF11	RP5-994D16.9	0.562731	4.88739e-33
TIRAP	RP5-994D16.9	0.511829	1.0796e-26
CASP9	SLC2A1-AS1	0.426532	3.46359e-18
CASP8	RP1-92O14.6	0.474979	1.00546e-22
CASP9	RP1-92O14.6	0.595357	1.01966e-37
GSDMB	RP1-92O14.6	0.534535	2.16762e-29
NLRC4	RP1-92O14.6	0.471139	2.44889e-22
NLRP6	RP1-92O14.6	0.437405	3.83207e-19
NOD1	RP1-92O14.6	0.567176	1.20726e-33
NOD2	RP1-92O14.6	0.411498	6.39607e-17
PLCG1	RP1-92O14.6	0.54065	3.75038e-30
PRKACA	RP1-92O14.6	0.458755	4.00987e-21
SCAF11	RP1-92O14.6	0.558877	1.61516e-32
TIRAP	RP1-92O14.6	0.439078	2.71184e-19
GSDMB	SZT2-AS1	0.424362	5.32514e-18
CASP9	HYI-AS1	0.40701	1.485e-16
GSDMB	HYI-AS1	0.444225	9.24697e-20
CASP3	KDM4A-AS1	0.400392	5.02624e-16
CASP8	KDM4A-AS1	0.433994	7.71111e-19
CASP9	KDM4A-AS1	0.55349	8.36823e-32
GSDMB	KDM4A-AS1	0.495826	6.54894e-25
NOD1	KDM4A-AS1	0.443692	1.03441e-19
PLCG1	KDM4A-AS1	0.428428	2.37312e-18
SCAF11	KDM4A-AS1	0.490899	2.22095e-24
TIRAP	KDM4A-AS1	0.446332	5.92005e-20
CASP9	ERI3-IT1	0.403059	3.08506e-16
GSDMB	ERI3-IT1	0.476097	7.74238e-23
NLRP6	ERI3-IT1	0.410094	8.335e-17
NOD1	ERI3-IT1	0.509092	2.21255e-26
PLCG1	ERI3-IT1	0.517331	2.50126e-27
CASP3	RP11-269F19.2	0.404567	2.33634e-16
CASP8	RP11-269F19.2	0.402427	3.46503e-16
CASP9	RP11-269F19.2	0.521481	8.15569e-28
NLRC4	RP11-269F19.2	0.4196	1.35321e-17
NOD1	RP11-269F19.2	0.421734	8.92517e-18
SCAF11	RP11-269F19.2	0.472612	1.74292e-22
TIRAP	RP11-269F19.2	0.43933	2.57402e-19
CASP8	LINC01144	0.413297	4.54619e-17
CASP9	LINC01144	0.421525	9.2978e-18
CASP3	RP11-767N6.7	0.427417	2.90436e-18
CASP8	RP11-767N6.7	0.51368	6.6212e-27
CASP9	RP11-767N6.7	0.487906	4.61846e-24
GSDMB	RP11-767N6.7	0.435861	5.26443e-19
NOD1	RP11-767N6.7	0.408428	1.1395e-16
PRKACA	RP11-767N6.7	0.447542	4.57729e-20
SCAF11	RP11-767N6.7	0.486493	6.50893e-24
GSDMB	RP4-533D7.4	0.449824	2.80881e-20
NOD1	RP4-533D7.4	0.423313	6.54753e-18
CASP8	MKNK1-AS1	0.427261	2.99596e-18
CASP9	MKNK1-AS1	0.453391	1.29959e-20
GSDMB	MKNK1-AS1	0.520544	1.05186e-27
NLRC4	MKNK1-AS1	0.440543	2.00024e-19
NLRP3	MKNK1-AS1	0.447568	4.55158e-20
NLRP6	MKNK1-AS1	0.444268	9.16213e-20
NOD1	MKNK1-AS1	0.550723	1.92547e-31
NOD2	MKNK1-AS1	0.403105	3.05938e-16
PLCG1	MKNK1-AS1	0.425796	4.00915e-18
SCAF11	MKNK1-AS1	0.465637	8.59989e-22
TIRAP	MKNK1-AS1	0.494103	1.00604e-24
GSDMB	EFCAB14-AS1	0.464345	1.15126e-21
NLRC4	EFCAB14-AS1	0.403793	2.69534e-16
NLRP6	EFCAB14-AS1	0.415719	2.86267e-17
NOD1	EFCAB14-AS1	0.483815	1.24161e-23
PLCG1	EFCAB14-AS1	0.406304	1.69361e-16
SCAF11	EFCAB14-AS1	0.485564	8.14776e-24
TIRAP	EFCAB14-AS1	0.43298	9.47836e-19
CASP8	CYP4A22-AS1	0.504865	6.61807e-26
NOD2	CYP4A22-AS1	0.403154	3.03152e-16
SCAF11	CYP4A22-AS1	0.419318	1.42945e-17
PYCARD	LINC00853	0.456487	6.60967e-21
NOD1	LINC01389	0.424384	5.30146e-18
NOD2	FOXD2-AS1	0.412003	5.81277e-17
GSDMB	RP5-850O15.3	0.418332	1.73038e-17
GSDMB	RP11-296A18.6	0.456415	6.71465e-21
NOD1	RP11-296A18.6	0.425688	4.09574e-18
PLCG1	RP11-296A18.6	0.416357	2.53254e-17
CASP9	RP4-657D16.3	0.444307	9.08852e-20
GSDMB	RP4-657D16.3	0.580502	1.60293e-35
NLRC4	RP4-657D16.3	0.458197	4.53579e-21
NLRP3	RP4-657D16.3	0.42706	3.1186e-18
NLRP6	RP4-657D16.3	0.436781	4.35807e-19
NOD1	RP4-657D16.3	0.599808	2.12731e-38
PLCG1	RP4-657D16.3	0.489438	3.17769e-24
SCAF11	RP4-657D16.3	0.478993	3.91781e-23
TIRAP	RP4-657D16.3	0.46711	6.15757e-22
NOD1	RP11-91A18.4	0.422069	8.35929e-18
CASP9	RP11-155O18.6	0.448976	3.36885e-20
GSDMB	RP11-155O18.6	0.545214	9.88993e-31
CASP8	RP5-1024G6.2	0.500803	1.86949e-25
CASP9	RP5-1024G6.2	0.514474	5.36279e-27
GSDMB	RP5-1024G6.2	0.513771	6.46229e-27
NLRC4	RP5-1024G6.2	0.41873	1.602e-17
NLRP6	RP5-1024G6.2	0.432048	1.14519e-18
NOD1	RP5-1024G6.2	0.557005	2.87007e-32
PLCG1	RP5-1024G6.2	0.445955	6.414e-20
PRKACA	RP5-1024G6.2	0.419899	1.27661e-17
SCAF11	RP5-1024G6.2	0.519325	1.46276e-27
TIRAP	RP5-1024G6.2	0.488796	3.71773e-24
CASP9	RP5-1024G6.7	0.441082	1.78775e-19
SCAF11	RP5-1024G6.7	0.41551	2.9793e-17
CASP8	RP5-1024G6.5	0.439589	2.43906e-19
CASP8	RP4-784A16.5	0.403558	2.81457e-16
IL1B	RP4-784A16.5	0.404257	2.47445e-16
NLRC4	RP4-784A16.5	0.462961	1.57143e-21
NLRP3	RP4-784A16.5	0.440982	1.82514e-19
NOD1	RP4-784A16.5	0.492892	1.35827e-24
NOD2	RP4-784A16.5	0.437417	3.8227e-19
TIRAP	RP4-784A16.5	0.405611	1.92609e-16
NLRC4	RP11-117D22.2	0.402437	3.45844e-16
NLRP3	RP11-117D22.2	0.436522	4.59647e-19
CASP8	SSBP3-AS1	0.409959	8.54965e-17
CASP9	SSBP3-AS1	0.491937	1.71986e-24
GSDMB	SSBP3-AS1	0.542778	2.01969e-30
NLRP1	SSBP3-AS1	0.426067	3.79923e-18
NLRP6	SSBP3-AS1	0.484998	9.34118e-24
NOD1	SSBP3-AS1	0.563378	3.9919e-33
PLCG1	SSBP3-AS1	0.597175	5.39221e-38
SCAF11	SSBP3-AS1	0.505024	6.35148e-26
TIRAP	SSBP3-AS1	0.43185	1.19183e-18
NOD1	RP5-997D24.3	0.401247	4.30054e-16
GSDMB	RP11-240D10.4	0.481283	2.27513e-23
GSDMB	RP11-67L3.2	0.451275	2.05539e-20
NOD1	RP11-67L3.2	0.482508	1.69834e-23
CASP8	RP11-67L3.5	0.52446	3.6138e-28
IL18	RP11-67L3.5	0.405521	1.95836e-16
CASP8	RP11-67L3.4	0.45768	5.08419e-21
CASP8	LINC01135	0.413811	4.12287e-17
CASP9	LINC01135	0.499689	2.47957e-25
CASP9	RP4-794H19.1	0.436251	4.85947e-19
AIM2	LINC01358	0.542105	2.45774e-30
CASP5	LINC01358	0.498176	3.6324e-25
GSDMD	LINC01358	0.432148	1.12211e-18
IL1B	LINC01358	0.47045	2.87013e-22
NLRC4	LINC01358	0.494049	1.0196e-24
NLRP3	LINC01358	0.516781	2.8985e-27
NOD2	LINC01358	0.515054	4.59623e-27
PYCARD	LINC01358	0.512745	8.47806e-27
CASP9	DLEU2L	0.426833	3.26245e-18
GSDMB	DLEU2L	0.503981	8.30486e-26
NOD1	DLEU2L	0.455889	7.53614e-21
PLCG1	DLEU2L	0.47773	5.27771e-23
SCAF11	DLEU2L	0.458745	4.01868e-21
TIRAP	DLEU2L	0.40947	9.37226e-17
GSDMB	LINC01359	0.475773	8.35333e-23
NLRP3	LINC01359	0.402337	3.52249e-16
GSDMB	RP4-535B20.4	0.434281	7.27236e-19
NLRP3	RP4-598P13.1	0.42016	1.2134e-17
CASP9	GNG12-AS1	0.489322	3.26903e-24
NOD1	GNG12-AS1	0.478584	4.31473e-23
PLCG1	GNG12-AS1	0.556518	3.33168e-32
SCAF11	GNG12-AS1	0.451692	1.87827e-20
GSDMB	RP11-180O5.2	0.427571	2.81633e-18
NOD1	RP11-180O5.2	0.40808	1.21619e-16
PLCG1	RP11-180O5.2	0.438403	3.11901e-19
SCAF11	RP11-180O5.2	0.426299	3.62803e-18
PLCG1	NEXN-AS1	0.469746	3.3733e-22
PLCG1	RP11-486G15.2	0.417352	2.09076e-17
PLCG1	RP11-131L23.1	0.404656	2.29828e-16
SCAF11	RP11-131L23.1	0.419633	1.34441e-17
CASP3	RP4-612B15.3	0.508384	2.66133e-26
CASP6	RP4-612B15.3	0.437802	3.53082e-19
CASP8	RP4-612B15.3	0.492569	1.47145e-24
CASP9	RP4-612B15.3	0.418719	1.60523e-17
SCAF11	RP4-612B15.3	0.434367	7.14712e-19
TIRAP	RP4-612B15.3	0.425408	4.32967e-18
PLCG1	RP11-413E1.4	0.442212	1.41136e-19
CASP8	RP4-717I23.3	0.48657	6.38734e-24
CASP9	RP4-717I23.3	0.458153	4.58011e-21
GSDMB	RP4-717I23.3	0.585088	3.45805e-36
NOD1	RP4-717I23.3	0.435139	6.10365e-19
SCAF11	RP4-717I23.3	0.433759	8.08886e-19
TIRAP	RP4-717I23.3	0.419248	1.44884e-17
CASP9	RP4-561L24.3	0.453218	1.34965e-20
NOD1	RP4-561L24.3	0.401255	4.2942e-16
PLCG1	RP4-561L24.3	0.453246	1.34136e-20
SCAF11	RP4-561L24.3	0.446232	6.04763e-20
TIRAP	RP4-561L24.3	0.425289	4.43265e-18
NLRC4	RP11-86H7.7	0.414403	3.68201e-17
NLRP3	RP11-86H7.7	0.409413	9.4743e-17
NOD1	RP11-86H7.7	0.498581	3.28e-25
PLCG1	RP11-86H7.7	0.494914	8.2227e-25
NLRP3	LINC01057	0.414447	3.65171e-17
NOD1	LINC01057	0.523203	5.10012e-28
PLCG1	LINC01057	0.4376	3.68104e-19
CASP9	RP4-639F20.1	0.43967	2.39825e-19
NOD1	RP4-639F20.1	0.441654	1.5862e-19
PLCG1	RP4-639F20.1	0.437083	4.09499e-19
GSDMB	RP11-57H12.5	0.420765	1.07864e-17
NOD1	RP11-57H12.5	0.48287	1.55769e-23
PLCG1	RP11-57H12.5	0.49622	5.93437e-25
SCAF11	RP11-57H12.5	0.405429	1.99223e-16
TIRAP	RP11-57H12.5	0.414232	3.80445e-17
CASP8	RP5-884G6.2	0.490079	2.71599e-24
CASP8	RP4-714D9.5	0.508442	2.62116e-26
CASP9	RP4-714D9.5	0.48996	2.79642e-24
GSDMB	RP4-714D9.5	0.514986	4.68056e-27
NLRP6	RP4-714D9.5	0.42206	8.37398e-18
NOD1	RP4-714D9.5	0.558032	2.09511e-32
PLCG1	RP4-714D9.5	0.490198	2.63748e-24
PRKACA	RP4-714D9.5	0.429491	1.91755e-18
SCAF11	RP4-714D9.5	0.535589	1.60615e-29
TIRAP	RP4-714D9.5	0.400899	4.58241e-16
CASP8	RTCA-AS1	0.418885	1.55466e-17
CASP9	RTCA-AS1	0.440912	1.85199e-19
SCAF11	RTCA-AS1	0.415454	3.01172e-17
CASP9	RP11-421L21.3	0.448142	4.02658e-20
NLRC4	RP4-575N6.4	0.406982	1.49266e-16
NLRP3	RP4-575N6.4	0.421965	8.53033e-18
CASP5	RP11-356N1.2	0.41421	3.82043e-17
NLRC4	RP11-356N1.2	0.400935	4.55213e-16
CASP8	RP5-1065J22.8	0.466284	7.42794e-22
IL1B	RP11-195M16.1	0.406834	1.53456e-16
TNF	RP11-195M16.1	0.421352	9.61842e-18
CASP8	RP4-773N10.4	0.474149	1.22005e-22
CASP9	RP4-773N10.4	0.520692	1.01038e-27
GSDMB	RP4-773N10.4	0.436908	4.24538e-19
NLRP6	RP4-773N10.4	0.453859	1.17386e-20
NOD1	RP4-773N10.4	0.627345	7.40495e-43
PLCG1	RP4-773N10.4	0.580823	1.44084e-35
PRKACA	RP4-773N10.4	0.458058	4.67785e-21
SCAF11	RP4-773N10.4	0.472993	1.59576e-22
TIRAP	RP4-773N10.4	0.429515	1.90836e-18
CASP8	LAMTOR5-AS1	0.447413	4.70461e-20
CASP9	LAMTOR5-AS1	0.493179	1.26525e-24
GSDMB	LAMTOR5-AS1	0.419631	1.34511e-17
SCAF11	LAMTOR5-AS1	0.450493	2.43249e-20
CASP9	RP5-1074L1.4	0.400962	4.53044e-16
GSDMB	RP5-1074L1.4	0.553357	8.71244e-32
NOD1	RP5-1074L1.4	0.41517	3.18016e-17
PLCG1	RP5-1074L1.4	0.478291	4.62393e-23
SCAF11	RP5-1074L1.4	0.444602	8.53901e-20
AIM2	RP11-284N8.3	0.584652	4.00536e-36
CASP5	RP11-284N8.3	0.527872	1.40815e-28
NLRC4	RP11-284N8.3	0.494537	9.03234e-25
NLRP3	RP11-284N8.3	0.5022	1.31014e-25
NOD2	RP11-284N8.3	0.484835	9.71459e-24
CASP8	RP11-96K19.4	0.41736	2.08755e-17
NLRP6	RP11-96K19.4	0.423217	6.67156e-18
CASP8	RP11-96K19.2	0.460849	2.51917e-21
NLRP6	RP11-96K19.2	0.439197	2.64588e-19
SCAF11	RP11-96K19.2	0.473068	1.56806e-22
SCAF11	RP11-552M11.4	0.427253	3.0005e-18
GSDMB	LINC01160	0.406427	1.65513e-16
GSDMB	RP4-671G15.2	0.486115	7.1321e-24
CASP8	RP11-426L16.3	0.416981	2.24583e-17
CASP9	RP11-426L16.3	0.469136	3.8792e-22
GSDMB	RP11-426L16.3	0.508723	2.43596e-26
NLRC4	RP11-426L16.3	0.424341	5.34635e-18
NLRP6	RP11-426L16.3	0.404827	2.22701e-16
NOD1	RP11-426L16.3	0.530971	5.92941e-29
PLCG1	RP11-426L16.3	0.46417	1.19774e-21
SCAF11	RP11-426L16.3	0.437317	3.90273e-19
TIRAP	RP11-426L16.3	0.429968	1.74235e-18
GSDMB	SLC16A1-AS1	0.458224	4.50954e-21
SCAF11	SLC16A1-AS1	0.472922	1.62218e-22
GSDMB	RP11-389O22.1	0.453213	1.35102e-20
CASP9	RP11-31F15.2	0.452066	1.73248e-20
GSDMB	RP11-31F15.2	0.484124	1.15293e-23
PLCG1	RP11-31F15.2	0.4602	2.91063e-21
PRKACA	RP11-31F15.2	0.418508	1.6722e-17
SCAF11	RP11-31F15.2	0.450143	2.62256e-20
CASP8	AP4B1-AS1	0.422062	8.3704e-18
CASP9	AP4B1-AS1	0.456951	5.96832e-21
GSDMB	AP4B1-AS1	0.56155	7.06165e-33
NLRP6	AP4B1-AS1	0.461843	2.01824e-21
NOD1	AP4B1-AS1	0.574796	1.04489e-34
PLCG1	AP4B1-AS1	0.514621	5.1572e-27
SCAF11	AP4B1-AS1	0.469284	3.75008e-22
TIRAP	AP4B1-AS1	0.510902	1.37772e-26
CASP8	HIPK1-AS1	0.430705	1.502e-18
CASP8	ATP1A1-AS1	0.437765	3.5581e-19
CASP9	ATP1A1-AS1	0.533218	3.14833e-29
NOD1	ATP1A1-AS1	0.468321	4.67318e-22
PLCG1	ATP1A1-AS1	0.450578	2.38849e-20
SCAF11	ATP1A1-AS1	0.458469	4.2712e-21
TIRAP	ATP1A1-AS1	0.483192	1.44209e-23
CASP8	RP5-1086K13.1	0.413979	3.99237e-17
GSDMB	RP5-1086K13.1	0.524842	3.25328e-28
NLRC4	RP5-1086K13.1	0.461377	2.23971e-21
NLRP3	RP5-1086K13.1	0.42313	6.78796e-18
NLRP6	RP5-1086K13.1	0.418648	1.62777e-17
NOD1	RP5-1086K13.1	0.532173	4.22789e-29
NOD2	RP5-1086K13.1	0.491139	2.09329e-24
SCAF11	RP5-1086K13.1	0.483941	1.20481e-23
TIRAP	RP5-1086K13.1	0.453556	1.25399e-20
CASP8	RP11-27K13.3	0.46086	2.51341e-21
CASP9	RP11-27K13.3	0.449975	2.7192e-20
NOD1	RP11-27K13.3	0.413805	4.12734e-17
NLRP1	WARS2-IT1	0.454907	9.34071e-21
NOD1	WARS2-IT1	0.450745	2.30402e-20
PLCG1	WARS2-IT1	0.490371	2.52815e-24
CASP8	RP11-418J17.1	0.473125	1.54773e-22
CASP9	RP11-418J17.1	0.535326	1.73094e-29
GSDMB	RP11-418J17.1	0.448526	3.70969e-20
NLRP1	RP11-418J17.1	0.41421	3.82063e-17
NOD1	RP11-418J17.1	0.448116	4.04946e-20
PLCG1	RP11-418J17.1	0.514259	5.67815e-27
SCAF11	RP11-418J17.1	0.483789	1.24945e-23
TIRAP	RP11-418J17.1	0.472382	1.8381e-22
PLCG1	LINC00622	0.536145	1.37056e-29
NOD1	RP5-1042I8.7	0.439041	2.73289e-19
PLCG1	RP11-439A17.9	0.43061	1.53127e-18
PLCG1	SRGAP2-AS1	0.412269	5.52694e-17
CASP3	CH17-437K3.1	0.404637	2.3066e-16
NLRC4	CH17-437K3.1	0.497946	3.84876e-25
NLRP3	CH17-437K3.1	0.49355	1.15408e-24
NOD1	CH17-437K3.1	0.505699	5.33735e-26
PLCG1	CH17-437K3.1	0.437619	3.6672e-19
SCAF11	CH17-437K3.1	0.422671	7.42809e-18
CASP5	RP5-998N21.4	0.432611	1.0215e-18
NLRC4	RP5-998N21.4	0.490062	2.72716e-24
NLRP3	RP5-998N21.4	0.465246	9.39572e-22
NOD1	RP11-403I13.8	0.462016	1.94173e-21
PLCG1	RP11-403I13.8	0.514426	5.43215e-27
TIRAP	RP11-403I13.8	0.430958	1.42724e-18
CASP9	RP11-458D21.1	0.511092	1.31046e-26
PLCG1	RP11-458D21.1	0.498891	3.03363e-25
SCAF11	RP11-458D21.1	0.406054	1.77393e-16
CASP3	RP11-337C18.8	0.4979	3.89402e-25
CASP8	RP11-337C18.8	0.513133	7.65222e-27
CASP9	RP11-337C18.8	0.524751	3.33566e-28
NOD1	RP11-337C18.8	0.481203	2.319e-23
PLCG1	RP11-337C18.8	0.514311	5.60005e-27
PRKACA	RP11-337C18.8	0.495361	7.35613e-25
SCAF11	RP11-337C18.8	0.533104	3.25113e-29
TIRAP	RP11-337C18.8	0.462613	1.69886e-21
CASP3	RP11-337C18.9	0.50737	3.46352e-26
CASP8	RP11-337C18.9	0.48135	2.23944e-23
CASP9	RP11-337C18.9	0.489121	3.43401e-24
NLRC4	RP11-337C18.9	0.410764	7.346e-17
NOD1	RP11-337C18.9	0.568523	7.86958e-34
NOD2	RP11-337C18.9	0.404628	2.31042e-16
PLCG1	RP11-337C18.9	0.540016	4.50618e-30
PRKACA	RP11-337C18.9	0.430549	1.55007e-18
SCAF11	RP11-337C18.9	0.495818	6.56248e-25
TIRAP	RP11-337C18.9	0.519459	1.41056e-27
CASP8	LINC00624	0.420522	1.13079e-17
GSDMB	LINC00624	0.412358	5.43433e-17
PLCG1	LINC00624	0.463496	1.3935e-21
SCAF11	LINC00624	0.525011	3.10596e-28
TIRAP	LINC00624	0.440329	2.09141e-19
CASP9	RP6-74O6.2	0.482751	1.60265e-23
GSDMB	RP6-74O6.2	0.48713	5.57738e-24
NOD1	RP6-74O6.2	0.431505	1.27794e-18
PLCG1	RP6-74O6.2	0.503675	8.98313e-26
PRKACA	RP6-74O6.2	0.403821	2.68154e-16
SCAF11	RP6-74O6.2	0.400936	4.55133e-16
CASP8	LINC01138	0.471211	2.40907e-22
GSDMB	LINC01138	0.444837	8.12574e-20
NOD1	LINC01138	0.401846	3.85425e-16
SCAF11	LINC01138	0.428958	2.13434e-18
CASP8	RP11-495P10.1	0.45923	3.6093e-21
GSDMB	RP11-495P10.1	0.421424	9.48369e-18
NOD1	RP11-495P10.1	0.427398	2.91508e-18
PLCG1	RP11-495P10.1	0.435164	6.0728e-19
SCAF11	RP11-495P10.1	0.441144	1.76479e-19
NLRC4	RP11-353N4.5	0.453484	1.27371e-20
NLRP3	RP11-353N4.5	0.440283	2.11169e-19
CASP8	RP11-196G18.22	0.453869	1.17135e-20
CASP9	RP11-196G18.22	0.477217	5.9542e-23
GSDMB	RP11-196G18.22	0.400547	4.88667e-16
NLRP6	RP11-196G18.22	0.443064	1.1806e-19
PLCG1	RP11-196G18.22	0.505916	5.04648e-26
SCAF11	RP11-196G18.22	0.47478	1.0533e-22
CASP9	RP11-54A4.2	0.427882	2.64693e-18
GSDMB	RP11-54A4.2	0.521242	8.70418e-28
NLRP6	RP11-54A4.2	0.428029	2.57004e-18
NOD1	RP11-54A4.2	0.460264	2.86974e-21
PLCG1	RP11-54A4.2	0.451681	1.88263e-20
SCAF11	RP11-54A4.2	0.464643	1.0766e-21
TIRAP	RP11-54A4.2	0.414717	3.46814e-17
GSDMB	ADAMTSL4-AS1	0.420222	1.19889e-17
NLRP3	ADAMTSL4-AS1	0.43727	3.94035e-19
NOD1	ADAMTSL4-AS1	0.536894	1.10659e-29
PLCG1	RP11-68I18.10	0.455711	7.83515e-21
GPX4	RP11-126K1.2	0.43119	1.36201e-18
CASP8	RP11-74C1.4	0.449773	2.83961e-20
CASP9	RP11-74C1.4	0.474746	1.06163e-22
NLRP6	RP11-74C1.4	0.426949	3.18799e-18
NOD1	RP11-74C1.4	0.541777	2.7039e-30
PLCG1	RP11-74C1.4	0.521576	7.94877e-28
SCAF11	RP11-74C1.4	0.507926	2.99755e-26
TIRAP	RP11-74C1.4	0.484967	9.41078e-24
CASP9	RP11-404E16.1	0.421695	8.99317e-18
NOD1	RP11-404E16.1	0.528006	1.35669e-28
PLCG1	RP11-404E16.1	0.484939	9.47441e-24
PRKACA	RP11-404E16.1	0.400393	5.02518e-16
SCAF11	RP11-404E16.1	0.48135	2.23902e-23
TIRAP	RP11-404E16.1	0.440312	2.09897e-19
CASP3	RP11-98D18.3	0.415061	3.24678e-17
CASP9	RP11-98D18.3	0.4648	1.03917e-21
NOD1	RP11-98D18.3	0.505922	5.03847e-26
PLCG1	RP11-98D18.3	0.477056	6.18355e-23
PRKACA	RP11-98D18.3	0.443784	1.01469e-19
SCAF11	RP11-98D18.3	0.439156	2.66822e-19
CASP8	AL450992.2	0.485729	7.83078e-24
CASP9	AL450992.2	0.495434	7.22235e-25
NOD1	AL450992.2	0.48754	5.04738e-24
NOD2	AL450992.2	0.42988	1.77353e-18
SCAF11	AL450992.2	0.427842	2.66787e-18
GSDMD	BX470102.3	0.405219	2.07092e-16
CASP8	RP1-178F15.4	0.471182	2.42497e-22
GSDMB	RP1-178F15.4	0.428462	2.35694e-18
CASP3	RP11-422P24.11	0.457508	5.28088e-21
CASP9	RP11-422P24.11	0.50947	2.00477e-26
PLCG1	RP11-422P24.11	0.444321	9.06044e-20
SCAF11	RP11-422P24.11	0.460814	2.53894e-21
TIRAP	RP11-422P24.11	0.413899	4.05391e-17
CASP8	RP11-350G8.5	0.449849	2.79353e-20
IL18	RP11-350G8.5	0.415749	2.84612e-17
NOD2	RP11-350G8.5	0.426673	3.36783e-18
CASP9	UBE2Q1-AS1	0.424546	5.13453e-18
GSDMB	UBE2Q1-AS1	0.504696	6.91218e-26
NLRP6	UBE2Q1-AS1	0.425452	4.29239e-18
NOD1	UBE2Q1-AS1	0.534285	2.32706e-29
PLCG1	UBE2Q1-AS1	0.511056	1.32313e-26
SCAF11	UBE2Q1-AS1	0.444064	9.56495e-20
TIRAP	UBE2Q1-AS1	0.513814	6.38902e-27
CASP9	RP11-263K19.4	0.427926	2.62373e-18
NLRP1	RP11-263K19.4	0.404224	2.48926e-16
CASP8	RUSC1-AS1	0.532837	3.50634e-29
CASP9	RUSC1-AS1	0.513116	7.68745e-27
GSDMB	RUSC1-AS1	0.601363	1.2232e-38
NLRC4	RUSC1-AS1	0.406615	1.59829e-16
NLRP6	RUSC1-AS1	0.506193	4.69861e-26
NOD1	RUSC1-AS1	0.555111	5.11764e-32
PLCG1	RUSC1-AS1	0.52293	5.49495e-28
PRKACA	RUSC1-AS1	0.452629	1.53338e-20
SCAF11	RUSC1-AS1	0.539698	4.94097e-30
TIRAP	RUSC1-AS1	0.457151	5.71199e-21
GSDMB	ASH1L-IT1	0.40534	2.02526e-16
NOD1	ASH1L-IT1	0.459871	3.13101e-21
PLCG1	ASH1L-IT1	0.401287	4.26878e-16
TIRAP	ASH1L-IT1	0.425699	4.08729e-18
CASP8	ASH1L-AS1	0.500131	2.21717e-25
SCAF11	ASH1L-AS1	0.450048	2.677e-20
CASP8	RP11-336K24.12	0.480836	2.53069e-23
GSDMB	RP11-336K24.12	0.483009	1.50664e-23
NLRP6	RP11-336K24.12	0.412682	5.10984e-17
GSDMB	RP11-66D17.5	0.424746	4.93573e-18
NLRP6	RP11-66D17.5	0.419759	1.31193e-17
NOD1	RP11-66D17.5	0.450795	2.27911e-20
PLCG1	RP11-66D17.5	0.437975	3.40745e-19
GSDMB	RP11-190A12.8	0.498215	3.59756e-25
CASP8	RP11-226L15.5	0.418885	1.55466e-17
NOD1	RP11-226L15.5	0.434045	7.63182e-19
PLCG1	RP11-226L15.5	0.541844	2.6519e-30
PRKACA	RP11-226L15.5	0.432156	1.12031e-18
SCAF11	RP11-226L15.5	0.443298	1.12386e-19
TIRAP	RP11-226L15.5	0.430395	1.59878e-18
CASP8	RP11-536C5.7	0.449989	2.71121e-20
CASP9	RP11-536C5.7	0.411475	6.42288e-17
GSDMB	RP11-536C5.7	0.452113	1.71463e-20
NLRC4	RP11-536C5.7	0.424496	5.18588e-18
NLRP3	RP11-536C5.7	0.429849	1.78471e-18
NLRP6	RP11-536C5.7	0.449857	2.78877e-20
NOD1	RP11-536C5.7	0.60808	1.08229e-39
NOD2	RP11-536C5.7	0.419	1.5204e-17
PLCG1	RP11-536C5.7	0.519665	1.33434e-27
SCAF11	RP11-536C5.7	0.499791	2.41659e-25
TIRAP	RP11-536C5.7	0.512642	8.71164e-27
CASP8	RP11-574F21.2	0.454509	1.01893e-20
CASP9	RP11-574F21.2	0.517618	2.31588e-27
NOD1	RP11-574F21.2	0.488507	3.98908e-24
PLCG1	RP11-574F21.2	0.410053	8.39935e-17
SCAF11	RP11-574F21.2	0.536122	1.37952e-29
TIRAP	RP11-574F21.2	0.523937	4.17158e-28
AIM2	RP11-404F10.2	0.422588	7.54932e-18
NOD2	RP11-404F10.2	0.444262	9.17428e-20
NLRC4	RP11-25K21.6	0.40907	1.01046e-16
NLRP3	RP11-25K21.6	0.517056	2.69301e-27
CASP3	RGS5	0.419886	1.27993e-17
NOD1	RGS5	0.420506	1.13442e-17
PLCG1	RGS5	0.43661	4.51424e-19
SCAF11	RGS5	0.403685	2.74932e-16
TIRAP	RGS5	0.408725	1.07794e-16
GSDMB	RP11-77M5.1	0.407579	1.33548e-16
CASP8	RP11-477H21.2	0.420741	1.08353e-17
SCAF11	RP11-477H21.2	0.413357	4.49465e-17
GSDMB	RP11-506O24.1	0.417318	2.1046e-17
CASP8	RP11-466F5.8	0.415584	2.93729e-17
CASP8	RP11-525G13.2	0.408868	1.04941e-16
CASP9	RP11-525G13.2	0.450553	2.4015e-20
GSDMB	RP11-525G13.2	0.486999	5.75636e-24
NLRP6	RP11-525G13.2	0.431953	1.16736e-18
NOD1	RP11-525G13.2	0.616192	5.34889e-41
PLCG1	RP11-525G13.2	0.595363	1.01762e-37
SCAF11	RP11-525G13.2	0.448038	4.11768e-20
TIRAP	RP11-525G13.2	0.510137	1.68353e-26
PLCG1	RP11-52A20.2	0.466486	7.09552e-22
NLRC4	RP3-455J7.4	0.430218	1.6569e-18
NLRP3	RP3-455J7.4	0.461591	2.13513e-21
SCAF11	RP1-313L4.3	0.405642	1.91501e-16
CASP8	RP1-206D15.6	0.415547	2.9587e-17
CASP9	RP1-206D15.6	0.45187	1.80721e-20
NOD1	RP1-206D15.6	0.459559	3.35583e-21
PLCG1	RP1-206D15.6	0.503951	8.36902e-26
SCAF11	RP1-206D15.6	0.412182	5.61892e-17
TIRAP	RP1-206D15.6	0.471169	2.43226e-22
PLCG1	RP11-576I22.2	0.428763	2.21917e-18
CASP8	RP11-296O14.3	0.406724	1.56629e-16
CASP9	RP11-296O14.3	0.555196	4.98576e-32
GSDMB	RP11-296O14.3	0.406749	1.55904e-16
NLRP1	RP11-296O14.3	0.414099	3.90236e-17
PLCG1	RP11-296O14.3	0.512517	9.00433e-27
PRKACA	RP11-296O14.3	0.440303	2.10291e-19
SCAF11	RP11-296O14.3	0.506016	4.91763e-26
TIRAP	RP11-296O14.3	0.40234	3.5206e-16
CASP8	GAS5-AS1	0.407453	1.36728e-16
GSDMB	GAS5-AS1	0.403593	2.79668e-16
PRKACA	GAS5-AS1	0.411137	6.84729e-17
SCAF11	GAS5-AS1	0.465889	8.12327e-22
GSDMB	RP1-102G20.5	0.489571	3.07545e-24
CASP9	RP11-195C7.1	0.42538	4.3541e-18
NOD1	RP11-195C7.1	0.420083	1.23179e-17
PRKACA	RP11-195C7.1	0.424524	5.15745e-18
CASP8	RP4-798P15.3	0.493746	1.09926e-24
CASP9	RP4-798P15.3	0.500187	2.18558e-25
GSDMB	RP4-798P15.3	0.443125	1.16554e-19
NLRP6	RP4-798P15.3	0.452156	1.69909e-20
NOD1	RP4-798P15.3	0.632528	9.54357e-44
PLCG1	RP4-798P15.3	0.604206	4.41327e-39
PRKACA	RP4-798P15.3	0.459671	3.27357e-21
SCAF11	RP4-798P15.3	0.541096	3.29532e-30
TIRAP	RP4-798P15.3	0.542832	1.98823e-30
PLCG1	RASAL2-AS1	0.498329	3.49556e-25
SCAF11	RASAL2-AS1	0.438726	2.91686e-19
GSDMB	C1orf220	0.426412	3.54727e-18
NOD1	C1orf220	0.435537	5.62606e-19
PLCG1	C1orf220	0.499904	2.34852e-25
SCAF11	C1orf220	0.448006	4.14566e-20
TIRAP	C1orf220	0.499097	2.87986e-25
CASP9	RP11-12M5.4	0.433357	8.78006e-19
CASP9	RP11-46A10.5	0.42502	4.67538e-18
NOD1	RP11-46A10.5	0.423474	6.34278e-18
PLCG1	RP11-46A10.5	0.520656	1.02047e-27
GSDMB	KIAA1614-AS1	0.409358	9.57224e-17
PLCG1	KIAA1614-AS1	0.545429	9.28413e-31
PLCG1	RP11-538D16.2	0.405018	2.14976e-16
CASP3	RP11-317P15.4	0.417917	1.87491e-17
NLRP1	RP11-317P15.4	0.471393	2.31007e-22
CASP8	RP11-181K3.4	0.400878	4.59966e-16
CASP9	RP11-181K3.4	0.407315	1.40305e-16
NOD1	RP11-181K3.4	0.502046	1.36242e-25
PLCG1	RP11-181K3.4	0.577228	4.71989e-35
SCAF11	RP11-181K3.4	0.460938	2.46977e-21
TIRAP	RP11-181K3.4	0.403574	2.80603e-16
CASP3	SMG7-AS1	0.435885	5.23906e-19
CASP8	SMG7-AS1	0.535357	1.71594e-29
CASP9	SMG7-AS1	0.555704	4.27153e-32
NLRP6	SMG7-AS1	0.486797	6.04649e-24
NOD1	SMG7-AS1	0.51722	2.57684e-27
PLCG1	SMG7-AS1	0.520729	1.00047e-27
PRKACA	SMG7-AS1	0.519461	1.41001e-27
SCAF11	SMG7-AS1	0.585293	3.22693e-36
TIRAP	SMG7-AS1	0.524342	3.73279e-28
CASP3	GS1-279B7.2	0.426642	3.38926e-18
PLCG1	GS1-279B7.2	0.535315	1.73664e-29
SCAF11	GS1-279B7.2	0.408868	1.04945e-16
TIRAP	GS1-279B7.2	0.411877	5.95318e-17
GSDMB	RP11-295K2.3	0.445061	7.75046e-20
PLCG1	RP11-295K2.3	0.410776	7.32946e-17
CASP8	RP11-101E13.5	0.421503	9.33777e-18
PRKACA	RP11-101E13.5	0.413267	4.57294e-17
SCAF11	RP11-101E13.5	0.45948	3.41494e-21
PLCG1	LINC01031	0.400421	5.00006e-16
NLRP1	RP11-168O16.1	0.450906	2.2253e-20
PLCG1	RP11-168O16.1	0.466778	6.64063e-22
CASP8	RP11-134G8.7	0.447293	4.82592e-20
CASP9	RP11-134G8.7	0.423505	6.305e-18
GSDMD	RP11-134G8.7	0.421654	9.06625e-18
CASP8	RP11-134G8.5	0.552663	1.07456e-31
CASP9	RP11-134G8.5	0.485695	7.89523e-24
GSDMB	RP11-134G8.5	0.482616	1.65514e-23
NOD1	RP11-134G8.5	0.464059	1.22794e-21
NOD2	RP11-134G8.5	0.411718	6.13445e-17
PRKACA	RP11-134G8.5	0.431664	1.23766e-18
SCAF11	RP11-134G8.5	0.51236	9.38645e-27
TIRAP	RP11-134G8.5	0.442849	1.23493e-19
NOD1	RP11-90L20.2	0.41936	1.41775e-17
PLCG1	RP11-90L20.2	0.512605	8.79753e-27
SCAF11	RP11-90L20.2	0.415335	3.08117e-17
PLCG1	RP11-307B6.3	0.419124	1.48408e-17
PRKACA	RP11-307B6.3	0.417721	1.94728e-17
CASP3	RP11-465N4.5	0.402193	3.61681e-16
CASP8	RP11-465N4.5	0.506698	4.12284e-26
GSDMB	RP11-465N4.5	0.509378	2.05337e-26
NLRP6	RP11-465N4.5	0.45279	1.48081e-20
NOD1	RP11-465N4.5	0.479939	3.13163e-23
SCAF11	RP11-465N4.5	0.538895	6.22902e-30
CASP8	RP11-510N19.5	0.419268	1.44335e-17
GSDMB	RP11-510N19.5	0.502793	1.12608e-25
GSDMC	RP11-510N19.5	0.40627	1.70412e-16
NOD1	RP11-510N19.5	0.413889	4.0619e-17
SCAF11	RP11-510N19.5	0.421074	1.01544e-17
PLCG1	RP11-480I12.7	0.454624	9.9369e-21
CASP8	LINC01353	0.406311	1.69119e-16
PLCG1	RP11-74C13.3	0.474422	1.14494e-22
TIRAP	RP11-739N20.2	0.412692	5.10009e-17
CASP8	RP11-430C7.4	0.411525	6.36318e-17
GSDMB	RP11-430C7.4	0.422714	7.365e-18
NOD1	RP11-430C7.4	0.510648	1.47245e-26
PLCG1	RP11-430C7.4	0.468209	4.79494e-22
CASP8	RP11-430C7.5	0.408112	1.20905e-16
GSDMB	RP11-430C7.5	0.56759	1.05857e-33
PLCG1	RP11-23I7.1	0.430178	1.67031e-18
NLRP6	LEMD1-AS1	0.411326	6.60747e-17
CASP8	C1orf147	0.449921	2.75108e-20
CASP9	C1orf147	0.402186	3.62165e-16
GSDMB	C1orf147	0.498061	3.73953e-25
GSDMD	C1orf147	0.422077	8.34506e-18
IL1B	C1orf147	0.471539	2.23314e-22
NLRC4	C1orf147	0.505166	6.12389e-26
NLRP3	C1orf147	0.528968	1.0381e-28
NLRP6	C1orf147	0.48735	5.28593e-24
NOD1	C1orf147	0.633666	6.05422e-44
NOD2	C1orf147	0.527062	1.763e-28
PLCG1	C1orf147	0.415245	3.13453e-17
PRKACA	C1orf147	0.410703	7.43231e-17
SCAF11	C1orf147	0.459562	3.3535e-21
TIRAP	C1orf147	0.528326	1.24146e-28
GSDMB	C1orf132	0.496407	5.66374e-25
NLRP6	C1orf132	0.438057	3.3501e-19
GSDMB	RP11-384C4.2	0.410924	7.12827e-17
CASP8	RP11-61J19.5	0.440555	1.99534e-19
CASP9	RP11-61J19.5	0.439905	2.28432e-19
CASP5	RP11-338C15.3	0.404481	2.37381e-16
NLRC4	RP11-338C15.3	0.447975	4.17284e-20
NLRP3	RP11-338C15.3	0.459558	3.35655e-21
NOD2	RP11-338C15.3	0.404161	2.51835e-16
CASP8	RP11-378J18.9	0.400476	4.94985e-16
CASP9	RP11-378J18.9	0.542269	2.34296e-30
GSDMB	RP11-378J18.9	0.427341	2.94846e-18
NLRP1	RP11-378J18.9	0.42325	6.62949e-18
NOD1	RP11-378J18.9	0.519486	1.40066e-27
PLCG1	RP11-378J18.9	0.597013	5.70804e-38
PRKACA	RP11-378J18.9	0.443162	1.15639e-19
SCAF11	RP11-378J18.9	0.465417	9.03829e-22
TIRAP	RP11-378J18.9	0.465747	8.38989e-22
CASP3	TAF1A-AS1	0.403686	2.74879e-16
CASP8	TAF1A-AS1	0.418975	1.5278e-17
CASP9	TAF1A-AS1	0.409288	9.698e-17
GSDMB	RP11-378J18.8	0.436514	4.60395e-19
NOD1	RP11-378J18.8	0.408518	1.12059e-16
PLCG1	RP11-378J18.8	0.407172	1.44081e-16
GPX4	RP11-452F19.3	0.447765	4.36471e-20
CASP8	RP11-504P24.8	0.450942	2.20833e-20
CASP9	RP11-504P24.8	0.488914	3.61182e-24
GSDMB	RP11-504P24.8	0.525461	2.74345e-28
NLRP6	RP11-504P24.8	0.420734	1.08507e-17
NOD1	RP11-504P24.8	0.409561	9.21405e-17
PLCG1	RP11-504P24.8	0.517601	2.32658e-27
PRKACA	RP11-504P24.8	0.421763	8.87537e-18
SCAF11	RP11-504P24.8	0.438375	3.1368e-19
CASP9	RP11-504P24.9	0.403475	2.85801e-16
GSDMB	RP11-504P24.9	0.512743	8.48422e-27
NOD1	RP11-504P24.9	0.427003	3.15418e-18
PLCG1	RP11-504P24.9	0.481897	1.96525e-23
SCAF11	RP11-504P24.9	0.451699	1.8754e-20
CASP9	RP11-365O16.6	0.429201	2.03277e-18
GSDMB	RP11-365O16.6	0.555261	4.88866e-32
SCAF11	RP11-365O16.6	0.405853	1.84134e-16
IL6	RP11-145A3.1	0.428321	2.4244e-18
NLRP3	RP11-145A3.1	0.418886	1.55434e-17
CASP8	RP11-285F7.2	0.473916	1.28789e-22
GSDMB	RP11-285F7.2	0.575383	8.63012e-35
NOD1	RP11-285F7.2	0.453626	1.23502e-20
PRKACA	RP11-285F7.2	0.410923	7.12942e-17
SCAF11	RP11-285F7.2	0.40709	1.46305e-16
GSDMB	RP11-275I14.4	0.407249	1.42031e-16
SCAF11	RP11-275I14.4	0.422943	7.04146e-18
GSDMB	SNAP47-AS1	0.411607	6.26517e-17
PLCG1	SNAP47-AS1	0.514699	5.05193e-27
GSDMB	RP5-881P19.7	0.451198	2.08983e-20
NLRP6	RP5-881P19.7	0.429023	2.10631e-18
NOD1	RP5-881P19.7	0.464017	1.23963e-21
PLCG1	IBA57-AS1	0.411937	5.88529e-17
NLRP1	RP5-1139B12.2	0.415968	2.72865e-17
NLRP3	RP5-1139B12.2	0.429432	1.9404e-18
NOD1	RP5-1139B12.2	0.517919	2.13633e-27
PLCG1	RP5-1139B12.2	0.567447	1.10779e-33
TIRAP	RP5-1139B12.2	0.446724	5.44803e-20
NLRC4	RP5-1139B12.3	0.406121	1.75222e-16
NLRP3	RP5-1139B12.3	0.508589	2.52241e-26
NOD1	RP5-1139B12.3	0.525007	3.10943e-28
PLCG1	RP5-1139B12.3	0.490413	2.50253e-24
TIRAP	RP5-1139B12.3	0.492829	1.37959e-24
GSDMB	RP5-1139B12.4	0.437038	4.13322e-19
NLRP1	RP5-1139B12.4	0.428209	2.47929e-18
NOD1	RP5-1139B12.4	0.490859	2.2424e-24
PLCG1	RP5-1139B12.4	0.561689	6.76223e-33
GSDMB	RP11-245P10.4	0.504225	7.80169e-26
CASP8	RP5-1061H20.4	0.483769	1.25567e-23
CASP9	RP5-1061H20.4	0.484365	1.08799e-23
NOD1	RP5-1061H20.4	0.544646	1.169e-30
SCAF11	RP5-1061H20.4	0.447353	4.76455e-20
TIRAP	RP5-1061H20.4	0.465065	9.78749e-22
GSDMB	RP4-803J11.2	0.455239	8.6876e-21
IL1B	RP11-552D4.1	0.409971	8.53027e-17
NLRP3	RP11-552D4.1	0.512108	1.00298e-26
GSDMB	RP5-956O18.2	0.416838	2.30852e-17
NOD1	RP5-956O18.2	0.554877	5.49471e-32
PLCG1	RP5-956O18.2	0.484491	1.05546e-23
TIRAP	RP5-956O18.2	0.485652	7.97626e-24
CASP9	RP5-858B6.3	0.425427	4.3136e-18
PLCG1	RP5-858B6.3	0.465091	9.72997e-22
GPX4	RP11-295G20.2	0.454375	1.04908e-20
CASP3	LINC01132	0.401133	4.39087e-16
CASP8	LINC01132	0.480097	3.01589e-23
CASP9	LINC01132	0.531303	5.40064e-29
SCAF11	LINC01132	0.477382	5.72782e-23
IL1B	RP11-443B7.3	0.47973	3.29032e-23
NLRC4	RP11-443B7.3	0.473032	1.58128e-22
NLRP3	RP11-443B7.3	0.54056	3.85003e-30
NOD2	RP11-443B7.3	0.451612	1.91098e-20
PYCARD	RP11-443B7.3	0.400592	4.8463e-16
CASP3	LINC01348	0.478228	4.69257e-23
CASP9	LINC01348	0.401569	4.05483e-16
GSDMB	LINC01348	0.400021	5.37738e-16
PLCG1	LINC01348	0.430603	1.53322e-18
SCAF11	LINC01348	0.415927	2.75026e-17
CASP8	RP11-385F5.5	0.401927	3.79753e-16
GSDMB	RP11-385F5.5	0.472221	1.90795e-22
PRKACA	RP11-385F5.5	0.406418	1.658e-16
GSDMB	RP11-385F5.4	0.47364	1.37326e-22
PLCG1	RP11-385F5.4	0.421064	1.01746e-17
PRKACA	RP11-385F5.4	0.427844	2.66683e-18
AIM2	CHRM3-AS2	0.461559	2.15063e-21
CASP5	CHRM3-AS2	0.414487	3.62342e-17
CASP8	LINC01347	0.433568	8.41086e-19
CASP9	LINC01347	0.503283	9.93248e-26
GSDMB	LINC01347	0.430195	1.66462e-18
NLRP6	LINC01347	0.443522	1.07211e-19
NOD1	LINC01347	0.535903	1.46858e-29
PLCG1	LINC01347	0.546095	7.62937e-31
SCAF11	LINC01347	0.434039	7.64059e-19
TIRAP	LINC01347	0.442892	1.22402e-19
GSDMB	RP11-261C10.5	0.400623	4.81935e-16
NOD1	RP11-261C10.5	0.439779	2.34455e-19
PLCG1	RP11-261C10.5	0.463035	1.54568e-21
GSDMB	RP11-518L10.5	0.405329	2.02946e-16
CASP8	HNRNPU-AS1	0.417857	1.89663e-17
GSDMB	HNRNPU-AS1	0.550684	1.94843e-31
NLRP6	HNRNPU-AS1	0.452642	1.52911e-20
NOD1	HNRNPU-AS1	0.455512	8.18386e-21
PLCG1	HNRNPU-AS1	0.482946	1.52933e-23
SCAF11	HNRNPU-AS1	0.446748	5.4197e-20
PLCG1	RP11-522M21.3	0.421522	9.30299e-18
GSDMB	RP11-83A16.1	0.409651	9.05942e-17
PLCG1	RP11-36N20.1	0.403086	3.06961e-16
GSDMB	RP11-1086F11.1	0.512668	8.6537e-27
NOD1	RP11-1086F11.1	0.402501	3.41811e-16
PLCG1	RP11-1086F11.1	0.43904	2.73345e-19
SCAF11	RP11-1086F11.1	0.41936	1.41778e-17
CASP9	RP11-439E19.9	0.416022	2.70068e-17
GSDMB	RP11-439E19.9	0.422325	7.94887e-18
NOD1	RP11-439E19.9	0.444254	9.18935e-20
PLCG1	RP11-439E19.9	0.42934	1.97653e-18
CASP9	RP11-439E19.10	0.460926	2.4766e-21
PLCG1	RP11-439E19.10	0.571494	3.041e-34
SCAF11	RP11-439E19.10	0.421798	8.81476e-18
CASP9	LINC01341	0.400422	4.99909e-16
PLCG1	LINC01341	0.478724	4.17496e-23
CASP8	RP11-488L18.10	0.402993	3.12281e-16
GSDMB	RP11-488L18.10	0.47274	1.69197e-22
SCAF11	RP11-488L18.10	0.455541	8.13261e-21
NOD1	AC019118.3	0.410211	8.15344e-17
PLCG1	AC019118.3	0.474229	1.1975e-22
NLRP1	TSSC1-IT1	0.409728	8.9294e-17
PLCG1	TSSC1-IT1	0.58933	8.19047e-37
CASP8	TRAPPC12-AS1	0.412884	4.9176e-17
CASP9	TRAPPC12-AS1	0.514942	4.73556e-27
GSDMB	TRAPPC12-AS1	0.40724	1.42276e-16
NLRP1	TRAPPC12-AS1	0.417508	2.02888e-17
NOD1	TRAPPC12-AS1	0.613716	1.35201e-40
PLCG1	TRAPPC12-AS1	0.632811	8.52296e-44
PRKACA	TRAPPC12-AS1	0.436068	5.04519e-19
SCAF11	TRAPPC12-AS1	0.493075	1.29822e-24
TIRAP	TRAPPC12-AS1	0.483443	1.35756e-23
CASP9	RP11-1293J14.1	0.436679	4.44997e-19
CASP9	AC142528.1	0.535119	1.83621e-29
PLCG1	AC142528.1	0.446324	5.93102e-20
SCAF11	AC142528.1	0.426815	3.27442e-18
CASP9	AC108488.4	0.4431	1.17161e-19
NLRP1	AC108488.4	0.429935	1.75387e-18
PLCG1	AC108488.4	0.577381	4.48966e-35
GSDMC	AC107057.1	-0.441323	1.69998e-19
GSDMC	AC010729.2	-0.406051	1.77501e-16
AIM2	NRIR	0.481634	2.09266e-23
GSDMB	NRIR	0.480764	2.57407e-23
GSDMC	NRIR	0.427243	3.00692e-18
GSDMD	NRIR	0.42724	3.00832e-18
NLRC4	NRIR	0.400268	5.14148e-16
NOD2	NRIR	0.476646	6.80855e-23
AIM2	AC092580.4	0.684711	9.62138e-54
CASP5	AC092580.4	0.537361	9.68048e-30
GSDMC	AC092580.4	0.438334	3.16381e-19
GSDMD	AC092580.4	0.416015	2.70463e-17
IL18	AC092580.4	0.449953	2.73224e-20
IL1B	AC092580.4	0.433728	8.14044e-19
NLRC4	AC092580.4	0.434307	7.23462e-19
NLRP3	AC092580.4	0.513891	6.25993e-27
NOD2	AC092580.4	0.5306	6.57841e-29
PYCARD	AC092580.4	0.550011	2.38358e-31
GSDMB	LINC00299	0.48354	1.32654e-23
NLRP6	LINC00299	0.425757	4.04e-18
NOD1	LINC00299	0.439336	2.57061e-19
CASP9	ID2-AS1	0.440185	2.155e-19
PLCG1	ID2-AS1	0.485536	8.20289e-24
GSDMB	RP11-400L8.2	0.487305	5.34488e-24
NLRP6	RP11-400L8.2	0.417723	1.94636e-17
NOD1	RP11-400L8.2	0.400016	5.38228e-16
PLCG1	RP11-400L8.2	0.449242	3.18249e-20
SCAF11	RP11-400L8.2	0.447742	4.38572e-20
CASP8	RP11-95D17.1	0.422353	7.90595e-18
CASP9	RP11-95D17.1	0.445123	7.64981e-20
PLCG1	RP11-95D17.1	0.425553	4.20706e-18
PRKACA	RP11-95D17.1	0.414746	3.44901e-17
SCAF11	RP11-95D17.1	0.516572	3.06504e-27
CASP8	RP11-254F7.2	0.425526	4.22975e-18
CASP9	RP11-254F7.2	0.436312	4.79905e-19
CASP9	C2orf48	0.407876	1.26348e-16
GSDMB	C2orf48	0.444891	8.03378e-20
PLCG1	C2orf48	0.431642	1.24304e-18
CASP8	RP11-320M2.1	0.429755	1.81871e-18
CASP9	RP11-320M2.1	0.513921	6.21047e-27
PLCG1	RP11-320M2.1	0.410515	7.69968e-17
SCAF11	RP11-320M2.1	0.457875	4.87055e-21
CASP9	AC007249.3	0.511956	1.04401e-26
CASP9	RN7SL832P	0.416883	2.28875e-17
PRKACA	RN7SL832P	0.415962	2.73202e-17
SCAF11	RN7SL832P	0.415672	2.88852e-17
NOD1	RP11-333O1.1	0.432646	1.01429e-18
TIRAP	RP11-333O1.1	0.460029	3.02343e-21
CASP8	LINC01376	0.429797	1.80336e-18
CASP9	LINC01376	0.541493	2.93717e-30
PLCG1	LINC01376	0.473151	1.53826e-22
SCAF11	LINC01376	0.453934	1.15498e-20
GSDMB	LINC00954	0.400847	4.62579e-16
NLRP1	LINC00954	0.485964	7.3984e-24
PLCG1	LINC00954	0.570699	3.92576e-34
SCAF11	LINC00954	0.409438	9.42871e-17
CASP9	AC079145.4	0.426474	3.50436e-18
NOD1	HS1BP3-IT1	0.476878	6.4482e-23
PLCG1	HS1BP3-IT1	0.422982	6.98772e-18
GSDMB	AC008073.7	0.432307	1.08653e-18
PLCG1	AC008073.7	0.461263	2.2975e-21
CASP3	RP11-443B20.1	0.48184	1.99239e-23
CASP9	RP11-443B20.1	0.590914	4.7562e-37
GSDMB	RP11-443B20.1	0.410304	8.01204e-17
NOD1	RP11-443B20.1	0.466703	6.75451e-22
PLCG1	RP11-443B20.1	0.620048	1.24199e-41
PRKACA	RP11-443B20.1	0.407916	1.25395e-16
SCAF11	RP11-443B20.1	0.51156	1.15878e-26
CASP9	DNAJC27-AS1	0.436282	4.82907e-19
CASP9	AC012074.2	0.430562	1.54592e-18
GSDMB	AC012074.2	0.422681	7.41365e-18
PLCG1	AC012074.2	0.578153	3.48322e-35
SCAF11	AC012074.2	0.403942	2.6225e-16
CASP9	RP11-503P10.1	0.530482	6.80024e-29
NOD1	RP11-503P10.1	0.422041	8.40401e-18
PLCG1	RP11-503P10.1	0.567769	1.00021e-33
GSDMB	AGBL5-IT1	0.403421	2.8865e-16
PLCG1	AGBL5-IT1	0.45907	3.73974e-21
CASP8	RP11-195B17.1	0.404799	2.23855e-16
CASP9	RP11-195B17.1	0.408473	1.12997e-16
GSDMB	RP11-195B17.1	0.472892	1.63354e-22
NOD1	RP11-195B17.1	0.443449	1.08875e-19
PLCG1	RP11-195B17.1	0.523114	5.22485e-28
SCAF11	RP11-195B17.1	0.42238	7.864e-18
TIRAP	RP11-195B17.1	0.403162	3.02735e-16
CASP8	GTF3C2-AS1	0.466586	6.93662e-22
CASP9	GTF3C2-AS1	0.56157	7.01642e-33
GSDMB	GTF3C2-AS1	0.516795	2.88773e-27
NLRC4	GTF3C2-AS1	0.455861	7.58293e-21
NLRP6	GTF3C2-AS1	0.470891	2.59308e-22
NOD1	GTF3C2-AS1	0.585576	2.9328e-36
PLCG1	GTF3C2-AS1	0.624031	2.68907e-42
SCAF11	GTF3C2-AS1	0.547752	4.67207e-31
TIRAP	GTF3C2-AS1	0.513275	7.37019e-27
CASP3	AC074117.10	0.445011	7.83283e-20
CASP8	AC074117.10	0.5063	4.57053e-26
CASP9	AC074117.10	0.561541	7.08087e-33
NLRP1	AC074117.10	0.429409	1.94945e-18
NLRP6	AC074117.10	0.460285	2.8562e-21
NOD1	AC074117.10	0.513325	7.27227e-27
PLCG1	AC074117.10	0.652556	2.37966e-47
PRKACA	AC074117.10	0.407218	1.42869e-16
SCAF11	AC074117.10	0.559911	1.17388e-32
TIRAP	AC074117.10	0.508466	2.6046e-26
CASP8	AC093690.1	0.408962	1.03101e-16
CASP9	AC093690.1	0.400629	4.81385e-16
GSDMB	AC093690.1	0.510447	1.55233e-26
NLRP6	AC093690.1	0.426858	3.2466e-18
NOD1	AC093690.1	0.463241	1.47581e-21
PLCG1	AC093690.1	0.458916	3.86936e-21
SCAF11	AC093690.1	0.433306	8.87123e-19
TIRAP	AC093690.1	0.411513	6.3769e-17
NOD2	FLJ31356	0.45068	2.33651e-20
NOD2	AC074011.2	0.403107	3.05832e-16
CASP9	AC109642.1	0.454948	9.2589e-21
GSDMB	RP11-1057B6.1	0.410644	7.51424e-17
CASP9	AL133245.2	0.403089	3.06792e-16
GSDMB	AL133245.2	0.44022	2.13931e-19
PLCG1	AL133245.2	0.466027	7.87416e-22
SCAF11	AL133245.2	0.426702	3.34846e-18
CASP8	AL133243.1	0.407813	1.27843e-16
PLCG1	AL133243.1	0.427872	2.65235e-18
SCAF11	AL133243.1	0.544153	1.35084e-30
CASP8	AL133243.2	0.4109	7.16103e-17
GSDMB	AL133243.2	0.45744	5.36057e-21
NOD1	AL133243.2	0.403344	2.92763e-16
PLCG1	AL133243.2	0.424174	5.52617e-18
SCAF11	AL133243.2	0.544405	1.2544e-30
NOD1	BIRC6-AS2	0.405322	2.03177e-16
PLCG1	LINC00486	0.402858	3.20106e-16
NOD1	AC020594.5	0.400698	4.75364e-16
CASP8	RP11-423P10.2	0.420427	1.15195e-17
CASP9	RP11-423P10.2	0.446484	5.73281e-20
GSDMB	RP11-423P10.2	0.488713	3.79345e-24
NOD1	RP11-423P10.2	0.46661	6.89914e-22
PLCG1	RP11-423P10.2	0.570123	4.72086e-34
SCAF11	RP11-423P10.2	0.551984	1.31831e-31
TIRAP	RP11-423P10.2	0.449792	2.82831e-20
AIM2	AC006369.2	0.482732	1.60969e-23
CASP5	AC006369.2	0.410541	7.66264e-17
NLRC4	AC006369.2	0.426565	3.44156e-18
NLRP3	AC006369.2	0.448918	3.41085e-20
NOD2	AC006369.2	0.452451	1.5938e-20
NOD1	CYP1B1-AS1	0.405573	1.93953e-16
CASP9	AC016995.3	0.420252	1.19188e-17
NLRP1	AC011247.3	0.439006	2.75274e-19
PLCG1	AC011247.3	0.434225	7.35626e-19
CASP3	SOS1-IT1	0.433383	8.73227e-19
CASP6	SOS1-IT1	0.404153	2.52239e-16
CASP9	SOS1-IT1	0.411058	6.9496e-17
PRKACA	SOS1-IT1	0.43592	5.201e-19
SCAF11	SOS1-IT1	0.466407	7.22455e-22
CASP3	AC007246.3	0.472796	1.67038e-22
CASP6	AC007246.3	0.420335	1.17288e-17
CASP8	AC007246.3	0.549617	2.68142e-31
CASP9	AC007246.3	0.47029	2.97758e-22
NOD1	AC007246.3	0.424854	4.83097e-18
PRKACA	AC007246.3	0.462552	1.7223e-21
SCAF11	AC007246.3	0.5543	6.5467e-32
TIRAP	AC007246.3	0.510133	1.68527e-26
CASP5	AC083949.1	0.421079	1.01437e-17
NLRC4	AC083949.1	0.461562	2.14902e-21
NLRP3	AC083949.1	0.441541	1.62418e-19
CASP8	LINC01126	0.417995	1.84668e-17
CASP9	LINC01126	0.477936	5.02673e-23
GSDMB	LINC01126	0.485295	8.69473e-24
NLRP6	LINC01126	0.444046	9.60088e-20
NOD1	LINC01126	0.53328	3.09397e-29
PLCG1	LINC01126	0.536153	1.36755e-29
SCAF11	LINC01126	0.466585	6.93769e-22
TIRAP	LINC01126	0.496704	5.25753e-25
GSDMB	AC010883.5	0.429917	1.76037e-18
GSDMB	U51244.2	0.404617	2.31523e-16
GSDMB	AC017006.2	0.412089	5.71816e-17
CASP9	RP11-417F21.1	0.449609	2.9415e-20
GSDMB	RP11-417F21.1	0.55645	3.40211e-32
NLRC4	RP11-417F21.1	0.423662	6.11217e-18
NOD1	RP11-417F21.1	0.443541	1.06787e-19
PLCG1	RP11-417F21.1	0.500115	2.226e-25
SCAF11	RP11-417F21.1	0.488412	4.08212e-24
PLCG1	RP11-333I13.1	0.45128	2.0531e-20
CASP9	AC016722.4	0.467193	6.04329e-22
GSDMB	AC016722.4	0.521991	7.09958e-28
NLRP1	AC016722.4	0.401953	3.77935e-16
NOD1	AC016722.4	0.50521	6.05507e-26
PLCG1	AC016722.4	0.598864	2.97167e-38
SCAF11	AC016722.4	0.526738	1.92855e-28
TIRAP	AC016722.4	0.432587	1.02666e-18
NOD1	AC093732.1	0.468511	4.47462e-22
GSDMB	AC073283.7	0.441262	1.72167e-19
NLRP6	AC073283.7	0.428343	2.41397e-18
NOD1	AC073283.7	0.499556	2.5647e-25
PLCG1	HCG2040054	0.563985	3.30125e-33
SCAF11	HCG2040054	0.419154	1.47546e-17
CASP3	AC079807.2	0.504441	7.3794e-26
CASP8	AC079807.2	0.522576	6.05203e-28
CASP9	AC079807.2	0.563053	4.41924e-33
NOD1	AC079807.2	0.41969	1.32974e-17
PLCG1	AC079807.2	0.513368	7.19034e-27
PRKACA	AC079807.2	0.500419	2.06071e-25
SCAF11	AC079807.2	0.595056	1.13255e-37
TIRAP	AC079807.2	0.45108	2.1437e-20
CASP9	AC093110.3	0.500546	1.99554e-25
GSDMB	AC093110.3	0.519633	1.34601e-27
NLRP1	AC093110.3	0.403402	2.8964e-16
NLRP6	AC093110.3	0.425578	4.1861e-18
NOD1	AC093110.3	0.564489	2.81858e-33
PLCG1	AC093110.3	0.631047	1.72087e-43
PRKACA	AC093110.3	0.418729	1.60237e-17
SCAF11	AC093110.3	0.495492	7.11895e-25
TIRAP	AC093110.3	0.47715	6.04817e-23
CASP9	AC012358.7	0.413303	4.54104e-17
GSDMB	AC012358.7	0.462851	1.6108e-21
NOD1	AC012358.7	0.452544	1.56215e-20
PLCG1	AC012358.7	0.558744	1.68272e-32
CASP9	AC012358.8	0.401998	3.74828e-16
GSDMB	AC012358.8	0.421212	9.88508e-18
NOD1	RP11-493E12.3	0.424288	5.40296e-18
PLCG1	RP11-493E12.3	0.402194	3.61582e-16
SCAF11	RP11-493E12.3	0.415931	2.74849e-17
GSDMB	RP11-493E12.1	0.401118	4.40271e-16
GSDMB	RP11-493E12.2	0.560888	8.6737e-33
PLCG1	RP11-493E12.2	0.47061	2.76619e-22
SCAF11	RP11-493E12.2	0.435285	5.92347e-19
CASP8	RP11-355B11.2	0.542467	2.21182e-30
CASP9	RP11-355B11.2	0.447523	4.59542e-20
NOD1	RP11-355B11.2	0.43468	6.70349e-19
PRKACA	RP11-355B11.2	0.414581	3.55936e-17
SCAF11	RP11-355B11.2	0.477929	5.03592e-23
TIRAP	RP11-355B11.2	0.47184	2.08332e-22
CASP9	AC107081.5	0.404057	2.56705e-16
GSDMB	AC107081.5	0.450324	2.52258e-20
SCAF11	AC107081.5	0.430968	1.42452e-18
CASP8	AC018462.2	0.434996	6.28501e-19
CASP9	AC018462.2	0.415966	2.73e-17
GSDMB	AC018462.2	0.458899	3.88404e-21
NOD1	AC018462.2	0.487373	5.25739e-24
PLCG1	AC018462.2	0.533441	2.95555e-29
SCAF11	AC018462.2	0.508889	2.33271e-26
GSDMB	AC009501.4	0.428877	2.16919e-18
CASP3	RP11-568N6.1	0.440296	2.10572e-19
CASP8	RP11-568N6.1	0.477269	5.88152e-23
SCAF11	RP11-568N6.1	0.470384	2.91375e-22
CASP8	AC007365.3	0.438495	3.05969e-19
CASP9	AC007365.3	0.472281	1.88184e-22
SCAF11	AC007365.3	0.402758	3.26045e-16
NLRP1	AC007386.4	0.411964	5.85521e-17
PLCG1	AC007386.4	0.41143	6.47863e-17
PLCG1	MEIS1-AS3	0.420093	1.22951e-17
GSDMB	RP11-474G23.3	0.437598	3.68311e-19
CASP9	AC092431.3	0.482759	1.59964e-23
CASP8	PCBP1-AS1	0.419898	1.27686e-17
CASP9	PCBP1-AS1	0.560269	1.05072e-32
NLRP1	PCBP1-AS1	0.458023	4.71393e-21
NOD1	PCBP1-AS1	0.407818	1.27717e-16
PLCG1	PCBP1-AS1	0.565989	1.75736e-33
SCAF11	PCBP1-AS1	0.543862	1.47107e-30
TIRAP	PCBP1-AS1	0.464738	1.05369e-21
GSDMB	ZNF638-IT1	0.400061	5.33865e-16
PLCG1	ZNF638-IT1	0.439464	2.5034e-19
GSDMB	RP11-434P11.2	0.416751	2.34751e-17
NLRP6	RP11-434P11.2	0.445364	7.26868e-20
NOD1	RP11-434P11.2	0.496591	5.40932e-25
PLCG1	RP11-434P11.2	0.508786	2.3966e-26
SCAF11	RP11-434P11.2	0.428689	2.25233e-18
PRKACA	DGUOK-AS1	0.426638	3.39158e-18
CASP9	AC073046.25	0.515314	4.28898e-27
NLRC4	AC073046.25	0.415886	2.77228e-17
NLRP1	AC073046.25	0.444052	9.59043e-20
NOD1	AC073046.25	0.595607	9.34164e-38
PLCG1	AC073046.25	0.693693	1.11424e-55
SCAF11	AC073046.25	0.486043	7.25738e-24
TIRAP	AC073046.25	0.563292	4.10177e-33
PLCG1	BOLA3-AS1	0.414989	3.29183e-17
SCAF11	BOLA3-AS1	0.412664	5.12761e-17
PLCG1	RP11-523H20.3	0.406431	1.65413e-16
CASP3	LBX2-AS1	0.458515	4.22824e-21
NLRC4	LBX2-AS1	0.413339	4.51041e-17
NOD1	LBX2-AS1	0.407334	1.39812e-16
NOD2	LBX2-AS1	0.408213	1.18627e-16
GSDMC	RP11-355F16.1	0.441848	1.52322e-19
NOD2	RP11-355F16.1	0.41927	1.44269e-17
CASP3	RP11-342K6.1	0.404837	2.22298e-16
CASP8	RP11-342K6.1	0.501817	1.44446e-25
CASP9	RP11-342K6.1	0.48482	9.75078e-24
NOD1	RP11-342K6.1	0.550085	2.33131e-31
PLCG1	RP11-342K6.1	0.561518	7.13082e-33
PRKACA	RP11-342K6.1	0.508736	2.42778e-26
SCAF11	RP11-342K6.1	0.599353	2.49949e-38
TIRAP	RP11-342K6.1	0.433452	8.6111e-19
CASP3	RP11-342K6.2	0.43037	1.60706e-18
CASP8	RP11-342K6.2	0.48984	2.87958e-24
CASP9	RP11-342K6.2	0.51296	8.00949e-27
GSDMB	RP11-342K6.2	0.473067	1.56867e-22
NLRC4	RP11-342K6.2	0.405811	1.85598e-16
NLRP1	RP11-342K6.2	0.452549	1.56034e-20
NOD1	RP11-342K6.2	0.584807	3.80215e-36
PLCG1	RP11-342K6.2	0.644753	6.49335e-46
PRKACA	RP11-342K6.2	0.430226	1.65425e-18
SCAF11	RP11-342K6.2	0.596984	5.76542e-38
TIRAP	RP11-342K6.2	0.484873	9.62784e-24
GSDMB	RP11-717A5.2	0.464069	1.22524e-21
NOD1	RP11-717A5.2	0.436624	4.5012e-19
CASP8	AC015971.2	0.413641	4.25804e-17
CASP9	AC015971.2	0.470768	2.66771e-22
GSDMB	AC015971.2	0.43822	3.23871e-19
NOD1	AC015971.2	0.500836	1.854e-25
PLCG1	AC015971.2	0.567558	1.06931e-33
SCAF11	AC015971.2	0.525154	2.9856e-28
TIRAP	AC015971.2	0.49425	9.69878e-25
AIM2	AC133644.2	0.607712	1.23797e-39
CASP5	AC133644.2	0.592591	2.66688e-37
IL1B	AC133644.2	0.467449	5.70059e-22
IL6	AC133644.2	0.460749	2.57603e-21
NLRC4	AC133644.2	0.458822	3.95078e-21
NLRP3	AC133644.2	0.497657	4.13899e-25
NOD2	AC133644.2	0.402058	3.70765e-16
PYCARD	AC133644.2	0.497445	4.36635e-25
GPX4	LINC00152	0.487423	5.19345e-24
PYCARD	LINC00152	0.49797	3.82645e-25
AIM2	RP11-1399P15.1	0.4775	5.57089e-23
NOD2	RP11-1399P15.1	0.420906	1.04919e-17
CASP8	AC062029.1	0.463798	1.30218e-21
CASP9	AC062029.1	0.514954	4.71985e-27
PLCG1	AC062029.1	0.479427	3.5355e-23
PRKACA	AC062029.1	0.467207	6.02331e-22
SCAF11	AC062029.1	0.470752	2.67752e-22
CASP3	RP11-440D17.3	0.425055	4.6428e-18
CASP8	RP11-440D17.3	0.490544	2.42306e-24
CASP9	RP11-440D17.3	0.539231	5.65351e-30
NOD1	RP11-440D17.3	0.407718	1.30123e-16
PLCG1	RP11-440D17.3	0.464833	1.03136e-21
SCAF11	RP11-440D17.3	0.44273	1.26615e-19
CASP8	RP11-440D17.4	0.405571	1.94027e-16
CASP8	LINC00342	0.41223	5.5675e-17
CASP9	LINC00342	0.416858	2.29985e-17
GSDMB	LINC00342	0.60634	2.03925e-39
NOD1	LINC00342	0.415404	3.04079e-17
PLCG1	LINC00342	0.432054	1.1438e-18
SCAF11	LINC00342	0.439872	2.30006e-19
CASP3	STARD7-AS1	0.462927	1.58355e-21
CASP8	STARD7-AS1	0.566176	1.65662e-33
CASP9	STARD7-AS1	0.694896	6.05747e-56
GSDMB	STARD7-AS1	0.427365	2.93453e-18
NLRC4	STARD7-AS1	0.488521	3.97574e-24
NLRP1	STARD7-AS1	0.408139	1.20276e-16
NLRP6	STARD7-AS1	0.454574	1.00468e-20
NOD1	STARD7-AS1	0.638522	8.49793e-45
PLCG1	STARD7-AS1	0.623839	2.89692e-42
PRKACA	STARD7-AS1	0.519249	1.49285e-27
SCAF11	STARD7-AS1	0.608057	1.0912e-39
TIRAP	STARD7-AS1	0.575828	7.4632e-35
NLRC4	AC021188.4	0.419798	1.30197e-17
NLRP3	AC021188.4	0.42972	1.83131e-18
CASP8	RP11-353K11.1	0.421594	9.17364e-18
CASP9	RP11-353K11.1	0.417954	1.86138e-17
SCAF11	RP11-353K11.1	0.43587	5.25454e-19
GSDMB	AC159540.1	0.462096	1.9075e-21
CASP8	LINC01125	0.437125	4.05978e-19
CASP9	LINC01125	0.525637	2.61414e-28
GSDMB	LINC01125	0.608787	8.35456e-40
NLRP1	LINC01125	0.402519	3.40706e-16
NLRP6	LINC01125	0.448772	3.51983e-20
PLCG1	LINC01125	0.500358	2.09285e-25
SCAF11	LINC01125	0.521768	7.54314e-28
AIM2	AC109826.1	0.481644	2.08783e-23
CASP5	AC109826.1	0.500078	2.24681e-25
IL1B	AC109826.1	0.460871	2.50703e-21
NLRC4	AC109826.1	0.538295	7.40207e-30
NLRP3	AC109826.1	0.556156	3.72159e-32
NOD2	AC109826.1	0.429179	2.0415e-18
CASP3	RP11-527J8.1	0.410035	8.42875e-17
CASP8	RP11-527J8.1	0.463709	1.32841e-21
CASP9	RP11-527J8.1	0.510105	1.6978e-26
GSDMB	RP11-527J8.1	0.505224	6.03282e-26
NOD1	RP11-527J8.1	0.474641	1.08806e-22
PLCG1	RP11-527J8.1	0.504288	7.67558e-26
PRKACA	RP11-527J8.1	0.412251	5.54614e-17
SCAF11	RP11-527J8.1	0.553845	7.51503e-32
TIRAP	AC016738.4	0.411622	6.24723e-17
CASP8	RP11-299H21.1	0.508275	2.7374e-26
CASP9	RP11-299H21.1	0.515574	4.00151e-27
NOD1	RP11-299H21.1	0.423614	6.17129e-18
PLCG1	RP11-299H21.1	0.481491	2.16532e-23
SCAF11	RP11-299H21.1	0.501691	1.49143e-25
NLRP3	AC007278.3	0.426809	3.27823e-18
SCAF11	AC104655.2	0.440157	2.16761e-19
CASP8	RP11-332H14.2	0.517704	2.26342e-27
CASP9	RP11-332H14.2	0.616601	4.58693e-41
GSDMB	RP11-332H14.2	0.51505	4.60072e-27
NLRP6	RP11-332H14.2	0.424228	5.46722e-18
NOD1	RP11-332H14.2	0.44925	3.17667e-20
PLCG1	RP11-332H14.2	0.632932	8.12294e-44
PRKACA	RP11-332H14.2	0.487108	5.60653e-24
SCAF11	RP11-332H14.2	0.55086	1.848e-31
TIRAP	RP11-332H14.2	0.401232	4.31195e-16
NLRP3	AC012360.6	0.416558	2.43649e-17
NOD1	AC012360.6	0.511977	1.03824e-26
PLCG1	AC012360.6	0.416416	2.50374e-17
TIRAP	AC012360.6	0.401561	4.06069e-16
PLCG1	AC009505.2	0.497681	4.11428e-25
CASP3	AC012487.2	0.422333	7.93697e-18
CASP8	AC012487.2	0.551119	1.70997e-31
CASP9	AC012487.2	0.533242	3.12737e-29
NLRP6	AC012487.2	0.450823	2.26567e-20
NOD1	AC012487.2	0.503817	8.6618e-26
PLCG1	AC012487.2	0.642951	1.37421e-45
PRKACA	AC012487.2	0.401558	4.06287e-16
SCAF11	AC012487.2	0.572381	2.28503e-34
TIRAP	AC012487.2	0.49854	3.3144e-25
CASP3	AC010095.5	0.405241	2.06273e-16
CASP8	AC010095.5	0.423385	6.4548e-18
CASP9	AC010095.5	0.414896	3.35113e-17
GSDMB	AC010095.5	0.412258	5.53818e-17
NLRC4	AC010095.5	0.401608	4.02574e-16
NOD1	AC010095.5	0.497212	4.62871e-25
PLCG1	AC010095.5	0.507287	3.53953e-26
SCAF11	AC010095.5	0.519617	1.35195e-27
TIRAP	AC010095.5	0.459551	3.36173e-21
NLRP1	SH3RF3-AS1	0.40198	3.76087e-16
NLRP3	SH3RF3-AS1	0.423136	6.77995e-18
NOD1	SH3RF3-AS1	0.426838	3.25917e-18
PLCG1	SH3RF3-AS1	0.548588	3.64361e-31
TIRAP	SH3RF3-AS1	0.475214	9.51938e-23
CASP8	AC013271.3	0.434926	6.3752e-19
CASP8	LINC01123	0.551591	1.48391e-31
NOD1	LINC01123	0.427765	2.70934e-18
SCAF11	LINC01123	0.495914	6.40756e-25
CASP3	RP11-1223D19.1	0.43132	1.32669e-18
CASP8	LINC01106	0.585329	3.18833e-36
NOD1	LINC01106	0.472383	1.83761e-22
SCAF11	LINC01106	0.5099	1.79158e-26
CASP9	AC096670.3	0.495707	6.74707e-25
PLCG1	AC096670.3	0.477854	5.12502e-23
SCAF11	AC096670.3	0.428135	2.51634e-18
NLRC4	AC108463.1	0.403972	2.60783e-16
NLRP3	AC108463.1	0.418921	1.54379e-17
GPX4	MIR4435-1HG	0.489734	2.95524e-24
GSDMD	MIR4435-1HG	0.40587	1.83565e-16
PYCARD	MIR4435-1HG	0.408883	1.04637e-16
NLRC4	RP11-181E10.3	0.408138	1.20311e-16
NLRP3	RP11-181E10.3	0.453041	1.40253e-20
NOD1	RP11-181E10.3	0.412905	4.89825e-17
NOD1	RP11-803D5.4	0.415858	2.7871e-17
AIM2	AC017002.1	0.482915	1.54073e-23
CASP5	AC017002.1	0.507428	3.41172e-26
IL6	AC017002.1	0.431662	1.23821e-18
NLRP3	AC017002.1	0.413214	4.61899e-17
PYCARD	AC017002.1	0.418982	1.52571e-17
CASP9	AC012442.6	0.445684	6.79333e-20
SCAF11	AC012442.6	0.433811	8.00397e-19
CASP3	AC079922.3	0.409543	9.24498e-17
CASP8	AC079922.3	0.466258	7.47134e-22
CASP9	AC079922.3	0.446665	5.51614e-20
GSDMD	AC079922.3	0.415704	2.8707e-17
SCAF11	AC079922.3	0.497551	4.25136e-25
GSDMB	AC016683.5	0.417704	1.95367e-17
NOD1	AC016683.5	0.473498	1.4192e-22
PLCG1	AC016683.5	0.430037	1.71848e-18
GSDMB	PAX8-AS1	0.439724	2.37196e-19
GSDMB	RP11-65I12.1	0.434949	6.34523e-19
CASP8	AC017074.2	0.451246	2.06807e-20
CASP9	AC017074.2	0.425824	3.98687e-18
NLRC4	AC017074.2	0.420477	1.14091e-17
NOD1	AC017074.2	0.455512	8.18463e-21
SCAF11	AC017074.2	0.45319	1.35765e-20
CASP8	RP11-141B14.1	0.412652	5.13951e-17
CASP9	RP11-141B14.1	0.450262	2.55635e-20
GSDMB	RP11-141B14.1	0.439482	2.49377e-19
PLCG1	RP11-141B14.1	0.506366	4.49258e-26
SCAF11	RP11-141B14.1	0.441764	1.55014e-19
CASP9	STEAP3-AS1	0.427353	2.9416e-18
NOD1	STEAP3-AS1	0.588476	1.09629e-36
PLCG1	STEAP3-AS1	0.511127	1.29843e-26
TIRAP	STEAP3-AS1	0.469368	3.67864e-22
CASP9	RP11-204L24.2	0.476132	7.67965e-23
CASP8	NIFK-AS1	0.477788	5.20539e-23
CASP9	NIFK-AS1	0.515556	4.02108e-27
PLCG1	NIFK-AS1	0.458036	4.70013e-21
PRKACA	NIFK-AS1	0.405792	1.86231e-16
SCAF11	NIFK-AS1	0.464982	9.97256e-22
CASP8	AC010976.2	0.430785	1.47817e-18
CASP9	AC010976.2	0.466076	7.78689e-22
GSDMB	AC010976.2	0.575071	9.55309e-35
NLRP6	AC010976.2	0.447675	4.44918e-20
NOD1	AC010976.2	0.495	8.04862e-25
PLCG1	AC010976.2	0.615935	5.89313e-41
SCAF11	AC010976.2	0.524528	3.54698e-28
CASP3	RP11-395A13.2	0.451229	2.07583e-20
CASP6	RP11-395A13.2	0.417515	2.02629e-17
CASP8	RP11-395A13.2	0.453515	1.26517e-20
CASP9	RP11-395A13.2	0.539065	5.93069e-30
PLCG1	RP11-395A13.2	0.523765	4.37247e-28
SCAF11	RP11-395A13.2	0.451524	1.94762e-20
PLCG1	AC079776.1	0.448042	4.11343e-20
CASP9	CCNT2-AS1	0.49344	1.18605e-24
PLCG1	CCNT2-AS1	0.490328	2.55502e-24
SCAF11	CCNT2-AS1	0.421214	9.88055e-18
TIRAP	CCNT2-AS1	0.405769	1.87028e-16
AIM2	AC011893.3	0.402643	3.33008e-16
CASP5	AC011893.3	0.459127	3.69253e-21
NLRC4	AC011893.3	0.403024	3.10483e-16
NLRP3	AC011893.3	0.437174	4.01956e-19
CASP8	DARS-AS1	0.507379	3.45567e-26
CASP9	DARS-AS1	0.452453	1.59293e-20
CASP8	AC097721.2	0.408052	1.22268e-16
CASP9	AC097721.2	0.410873	7.19682e-17
GSDMB	AC114763.1	0.436911	4.24254e-19
PLCG1	AC114763.1	0.418505	1.67335e-17
AIM2	ZEB2-AS1	0.483104	1.4725e-23
CASP5	ZEB2-AS1	0.568225	8.65123e-34
IL1B	ZEB2-AS1	0.525635	2.61514e-28
NLRC4	ZEB2-AS1	0.608003	1.11319e-39
NLRP3	ZEB2-AS1	0.715405	1.14219e-60
NOD1	ZEB2-AS1	0.445259	7.43314e-20
NOD2	ZEB2-AS1	0.495872	6.47468e-25
AIM2	AC092484.1	0.482254	1.80461e-23
CASP5	AC092484.1	0.504184	7.88347e-26
IL1B	AC092484.1	0.565454	2.08023e-33
NLRC4	AC092484.1	0.505055	6.30205e-26
NLRP3	AC092484.1	0.510612	1.48656e-26
NOD2	AC092484.1	0.465928	8.05221e-22
TNF	AC092484.1	0.545443	9.24627e-31
CASP8	RP11-546J1.1	0.45999	3.04984e-21
GSDMB	RP11-546J1.1	0.440621	1.96805e-19
CASP8	AC005042.4	0.425383	4.35124e-18
CASP9	AC005042.4	0.455621	7.99116e-21
GSDMB	AC005042.4	0.513868	6.29789e-27
NLRP6	AC005042.4	0.447497	4.62068e-20
NOD1	AC005042.4	0.493626	1.13263e-24
PLCG1	AC005042.4	0.50093	1.81003e-25
SCAF11	AC005042.4	0.459993	3.04789e-21
TIRAP	AC005042.4	0.41432	3.74149e-17
CASP8	AC009506.1	0.525979	2.37826e-28
CASP9	AC009506.1	0.476046	7.83552e-23
SCAF11	AC009506.1	0.479965	3.11182e-23
CASP8	AC009961.3	0.483269	1.41544e-23
CASP9	AC009961.3	0.457762	4.99316e-21
SCAF11	AC009961.3	0.490238	2.61175e-24
CASP5	AC007750.5	0.408639	1.0954e-16
IL6	AC007750.5	0.436683	4.4466e-19
NLRP3	AC007750.5	0.451308	2.04061e-20
CASP8	AC009495.2	0.517583	2.33781e-27
CASP9	AC009495.2	0.489859	2.86662e-24
GSDMB	AC009495.2	0.400261	5.14734e-16
SCAF11	AC009495.2	0.431414	1.30171e-18
CASP8	AC009495.4	0.478389	4.51798e-23
CASP9	AC007277.3	0.4167	2.37056e-17
CASP8	AC007405.4	0.453433	1.28797e-20
CASP9	AC007405.4	0.521053	9.16263e-28
SCAF11	AC007405.4	0.405596	1.9312e-16
CASP8	AC007405.6	0.482079	1.88185e-23
GSDMB	AC068039.4	0.423726	6.03607e-18
PLCG1	AC068039.4	0.408557	1.11226e-16
CASP3	AC093818.1	0.460233	2.88931e-21
CASP8	AC093818.1	0.443799	1.01147e-19
CASP9	AC093818.1	0.510591	1.49486e-26
NLRC4	AC093818.1	0.462342	1.80506e-21
SCAF11	AC093818.1	0.427421	2.90215e-18
TIRAP	AC093818.1	0.405337	2.02632e-16
CASP8	RP11-394I13.2	0.433587	8.37866e-19
GSDMB	RP11-394I13.2	0.487406	5.21477e-24
SCAF11	RP11-394I13.2	0.42866	2.26551e-18
PLCG1	RP11-394I13.1	0.438848	2.84455e-19
CASP3	AC096649.2	0.406892	1.51813e-16
CASP8	AC096649.2	0.405188	2.08293e-16
CASP9	AC096649.2	0.449517	3.00023e-20
NOD1	AC096649.2	0.447687	4.4376e-20
PLCG1	AC096649.2	0.446223	6.05925e-20
SCAF11	AC096649.2	0.422903	7.09728e-18
TIRAP	AC096649.2	0.430302	1.62911e-18
CASP9	AC074286.1	0.521816	7.44437e-28
GSDMB	AC074286.1	0.413016	4.79598e-17
NLRC4	AC074286.1	0.530724	6.35403e-29
NLRP1	AC074286.1	0.407831	1.27426e-16
NLRP3	AC074286.1	0.468729	4.2576e-22
NOD1	AC074286.1	0.493314	1.22352e-24
PLCG1	AC074286.1	0.448941	3.39406e-20
SCAF11	AC074286.1	0.47288	1.63817e-22
GSDMB	RP11-337N6.2	0.409861	8.70913e-17
CASP3	AC009948.5	0.525714	2.55868e-28
CASP6	AC009948.5	0.439202	2.6433e-19
CASP9	AC009948.5	0.4351	6.15302e-19
NLRP1	AC009948.5	0.43406	7.60889e-19
PLCG1	AC009948.5	0.4861	7.15745e-24
PRKACA	AC009948.5	0.428752	2.22386e-18
SCAF11	AC009948.5	0.497114	4.74453e-25
CASP8	TTN-AS1	0.481394	2.21586e-23
NOD1	TTN-AS1	0.428691	2.25159e-18
SCAF11	TTN-AS1	0.479637	3.36368e-23
SCAF11	RP11-65L3.4	0.446746	5.42186e-20
SCAF11	RP11-65L3.2	0.418386	1.71215e-17
CASP8	RP11-171I2.5	0.407043	1.47593e-16
CASP8	RP11-171I2.2	0.441175	1.7532e-19
SCAF11	RP11-171I2.2	0.417531	2.0198e-17
GSDMB	RP11-171I2.4	0.40731	1.40437e-16
AIM2	AC104820.2	0.562729	4.88946e-33
CASP5	AC104820.2	0.509899	1.79176e-26
NLRC4	AC104820.2	0.455147	8.86496e-21
NLRP3	AC104820.2	0.47058	2.7856e-22
NOD2	AC104820.2	0.428905	2.15698e-18
CASP8	RP11-366L5.1	0.484332	1.09672e-23
SCAF11	RP11-366L5.1	0.456646	6.38316e-21
CASP8	RP11-438L19.1	0.409256	9.75646e-17
GSDMB	FSIP2-AS1	0.402435	3.45954e-16
CASP8	LINC01473	0.473863	1.30384e-22
CASP9	LINC01473	0.442349	1.37149e-19
SCAF11	LINC01473	0.430194	1.66495e-18
CASP8	RP11-410E4.1	0.408105	1.21059e-16
NOD1	AC017101.10	0.412185	5.61515e-17
CASP9	OSGEPL1-AS1	0.404467	2.38028e-16
CASP8	AC006460.2	0.441912	1.50306e-19
NOD1	AC006460.2	0.401204	4.33438e-16
NLRC4	AC067945.4	0.409312	9.65451e-17
PLCG1	AC092614.2	0.531222	5.52583e-29
NLRC4	RP11-347P5.1	0.408397	1.14619e-16
NLRP3	RP11-347P5.1	0.432704	1.00241e-18
NOD1	RP11-347P5.1	0.448745	3.53963e-20
IL6	AC020571.3	0.413436	4.42772e-17
NLRP3	AC020571.3	0.440315	2.09768e-19
CASP8	CFLAR-AS1	0.467717	5.36314e-22
GSDMB	CFLAR-AS1	0.541637	2.81646e-30
NLRP6	CFLAR-AS1	0.4211	1.0102e-17
NOD1	CFLAR-AS1	0.481851	1.98709e-23
SCAF11	CFLAR-AS1	0.429127	2.06286e-18
CASP8	AC079354.3	0.446424	5.80593e-20
SCAF11	AC079354.3	0.433524	8.48678e-19
NLRP3	AC007362.3	0.478949	3.95848e-23
NOD1	AC007362.3	0.458804	3.96692e-21
CASP8	AC007383.3	0.614645	9.55776e-41
PLCG1	AC007383.3	0.400541	4.89153e-16
PRKACA	AC007383.3	0.418646	1.62839e-17
SCAF11	AC007383.3	0.416704	2.36897e-17
NLRC4	AC007879.7	0.408413	1.14269e-16
NLRP3	AC007879.7	0.408966	1.03027e-16
NOD2	AC007879.7	0.430953	1.42868e-18
CASP8	AC007879.5	0.472595	1.74985e-22
GSDMB	AC007879.5	0.423035	6.91475e-18
NLRC4	AC007879.5	0.425428	4.31211e-18
NOD1	AC007879.5	0.422289	8.00623e-18
NOD2	AC007879.5	0.447855	4.28138e-20
SCAF11	AC007879.5	0.453207	1.35278e-20
AIM2	AC079767.4	0.556425	3.42757e-32
CASP5	AC079767.4	0.462298	1.82295e-21
NLRC4	AC079767.4	0.436208	4.90285e-19
NLRP3	AC079767.4	0.4279	2.63749e-18
CASP8	AC096772.6	0.561574	7.00762e-33
CASP9	AC096772.6	0.459536	3.37283e-21
NOD1	AC096772.6	0.465489	8.89278e-22
PLCG1	AC096772.6	0.592804	2.47742e-37
PRKACA	AC096772.6	0.513245	7.4293e-27
SCAF11	AC096772.6	0.551706	1.43361e-31
GSDMB	RP11-260M2.1	0.528946	1.04459e-28
SCAF11	RP11-260M2.1	0.409416	9.468e-17
CASP8	AC007038.7	0.40731	1.40421e-16
GSDMB	AC007038.7	0.552843	1.01746e-31
CASP9	LANCL1-AS1	0.431521	1.27403e-18
PLCG1	LANCL1-AS1	0.575804	7.52266e-35
CASP9	AC072062.1	0.401994	3.75126e-16
PLCG1	AC072062.1	0.45453	1.01431e-20
NLRP3	LINC00607	0.42606	3.80461e-18
CASP5	AC093850.2	0.420366	1.1659e-17
IL6	AC093850.2	0.464445	1.12576e-21
NLRC4	AC093850.2	0.400879	4.59914e-16
NLRP3	AC093850.2	0.508376	2.66686e-26
PLCG1	PKI55	0.519161	1.52871e-27
CASP8	AC098820.3	0.42138	9.56552e-18
CASP9	AC098820.3	0.439762	2.35287e-19
CASP8	RP11-378A13.1	0.420797	1.0719e-17
CASP9	RP11-378A13.1	0.409837	8.7488e-17
NLRC4	RP11-378A13.1	0.403672	2.75614e-16
NOD1	RP11-378A13.1	0.488386	4.10808e-24
SCAF11	RP11-378A13.1	0.417979	1.85236e-17
CASP9	CATIP-AS2	0.406178	1.73376e-16
PLCG1	CATIP-AS2	0.40122	4.32122e-16
CASP9	RP11-378A13.2	0.443462	1.08581e-19
SCAF11	RP11-378A13.2	0.404804	2.23646e-16
PRKACA	RP11-548H3.1	0.427403	2.91242e-18
PLCG1	LINC01494	0.457359	5.45599e-21
PLCG1	RP11-256I23.1	0.465903	8.09783e-22
PLCG1	RP11-256I23.2	0.430754	1.48737e-18
GSDMB	RP11-16P6.1	0.424489	5.1931e-18
NOD1	RP11-16P6.1	0.417331	2.09955e-17
PLCG1	RP11-16P6.1	0.496953	4.93977e-25
PRKACA	RP11-16P6.1	0.409479	9.35658e-17
TIRAP	RP11-16P6.1	0.408587	1.10615e-16
PLCG1	RP11-395N3.2	0.413165	4.66184e-17
CASP8	AC097662.2	0.420424	1.15275e-17
CASP9	AC097662.2	0.521005	9.28276e-28
NOD1	AC097662.2	0.440614	1.97102e-19
PLCG1	AC097662.2	0.541673	2.78727e-30
PRKACA	AC097662.2	0.418902	1.54932e-17
SCAF11	AC097662.2	0.425418	4.32118e-18
TIRAP	AC097662.2	0.404121	2.53696e-16
PLCG1	FBXO36-IT1	0.42329	6.57738e-18
CASP8	AC009950.2	0.571914	2.65652e-34
GSDMB	AC009950.2	0.564219	3.06767e-33
GSDMD	AC009950.2	0.411091	6.90683e-17
NLRP6	AC009950.2	0.411762	6.08366e-17
NOD1	AC009950.2	0.504129	7.99682e-26
NOD2	AC009950.2	0.53216	4.2442e-29
SCAF11	AC009950.2	0.465814	8.26329e-22
TIRAP	AC009950.2	0.401521	4.09027e-16
[truncated: 12,738 more rows]
